# Patient-Satisfaction Measures in Anesthesia

## Qualitative Systematic Review

Sarah F. Barnett, M.B.B.S., B.Sc., F.R.C.A.,\* Ravi K. Alagar, M.B.C.H.B., F.R.C.A.,† Michael P. W. Grocott, B.Sc., M.D., F.R.C.A., F.R.C.P., F.F.I.C.M.,‡ Savvas Giannaris, D.E.S.A., F.F.I.C.M.,\* John R. Dick, M.B.B.S., F.R.C.A.,\* Suneetha Ramani Moonesinghe, B.Sc., F.R.C.A., M.R.C.P., F.F.I.C.M.§

\* Centre for Anaesthesia, University College Hospital, London, United Kingdom, and Consultant in Anaesthesia, University College London Hospitals NHS (National Health Service) Foundation Trust, London, United Kingdom. † Centre for Anaesthesia, University College Hospital, and Locum Consultant in Anaesthesia, Hexham General Hospital Northumbria NHS Trust, Hexham, United Kingdom. ‡ Centre for Anaesthesia, University College Hospital; Professor of Anaesthesia and Critical Care Medicine, University of Southampton, Southampton, United Kingdom; Consultant in Critical Care Medicine, University Hospital Southampton NHS Foundation Trust, Southampton, United Kingdom; and Director, National Institute of Academic Anaesthesia Health Services Research Centre and British Oxygen Company Professor of Anaesthesia, Royal College of Anaesthetists, London, United Kingdom. § Consultant and Honorary Senior Lecturer in Anaesthesia and Critical Care Medicine, University College London Hospitals NHS Foundation Trust; Director, UCL/UCLH Surgical Outcome Research Centre (SOuRCe), Department of Applied Health Research, University College London, London, United Kingdom; and Centre for Anaesthesia, University College Hospital.

Received from the University College London/University College London Hospital (UCL/UCLH) Surgical Outcomes Research Centre, University College Hospital, London, United Kingdom. Submitted for publication September 13, 2012. Accepted for publication March 26, 2013. Funded in part by the University College London Hospital, University College London Biomedical Research Centre, London, United Kingdom (to Dr. Moonesinghe), which received a portion of its funding from the United Kingdom Department of Health's National Institute of Health Research Biomedical Research Centre funding scheme, London, United Kingdom. Dr. Grocott holds the British Oxygen Company Chair of Anaesthesia at the Royal College of Anaesthetists, London, United Kingdom. Funded in part by the University Hospitals Southampton National Health Service Foundation Trust, University of Southampton Respiratory Biomedical Research Unit, Southampton, United Kingdom (to Dr. Grocott), which received a portion of its funding from the United Kingdom Department of Health's National Institute of Health Research Biomedical Research Unit funding scheme. Dr. Grocott is Director, and Dr. Moonesinghe is a member of the Executive Board of the National Institute for Academic Anaesthesia's Health Services Research Centre. Drs. Grocott and Moonesinghe serve on the Board and Research Council of the National Institute for Academic Anaesthesia. Drs. Grocott and Moonesinghe have received funding from the National Institute of Health Research, the National Institute of Academic Anaesthesia, and the Frances and Augustus Newman Foundation to conduct Health Services Research.

Address correspondence to Dr. Barnett: Centre for Anaesthesia, 3rd Floor, Maples Link Corridor, University College Hospital, 235 Euston Road, London, United Kingdom, NW1 2BU.

Copyright © 2013, the American Society of Anesthesiologists, Inc. Lippincott Williams & Wilkins. Anesthesiology 2013; 119:452-78

### ABSTRACT

Patient satisfaction is an important measure of the quality of health care and is used as an outcome measure in interventional and quality improvement studies. Previous studies have found that there are few appropriately developed and validated questionnaires available. The authors conducted a systematic review to identify all tools used to measure patient satisfaction with anesthesia, which have undergone a psychometric development and validation process, appraised the quality of these processes, and made recommendations of tools that may be suitable for use in different clinical and academic settings. There are a number of robustly developed and subsequently validated instruments, however, there are still many studies using nonvalidated instruments or poorly developed tools, claiming to accurately assess satisfaction with anesthesia. This can lead to biased and inaccurate results. Researchers in this field should be encouraged to use available validated tools, to ensure that patient satisfaction is measured and reported fairly and accurately.

**P**ATIENT satisfaction is an important measure of the quality of health care. Satisfaction with anesthesia is used as an outcome measure in clinical trials,<sup>1</sup> and patient satisfaction is considered to be an integral part of service quality.<sup>2</sup> Its measurement is also required to fulfill performance improvement and revalidation agendas for healthcare professionals.<sup>3</sup> However, clinical experience tells us that appropriately developed or validated instruments are not widely used in any of these settings.

sarahfbarnett@googlemail.com. This article may be accessed for personal use at no charge through the Journal Web site, [www.anesthesiology.org](http://www.anesthesiology.org).

◆ This article is accompanied by an Editorial View. Please see: Vetter TR, Ivankova NV, Pittet J-F: Patient satisfaction with anesthesia: Beauty is in the eye of the consumer. ANESTHESIOLOGY 2013; 119:245-7.

Pascoe<sup>4</sup> defined patient satisfaction as the patient's reaction consisting of a "cognitive evaluation" and "emotional response" to the care they receive. It, therefore, seems prudent to ensure that patients are involved in the development of satisfaction tools, particularly because it is also subject to the sociodemographic, cultural influences, and cognition of the patients.<sup>5</sup> The Picker inpatient survey<sup>6</sup> is a well-known tool used in Europe to measure "patient experience," however, there have been many flaws detected in its design, including the lack of patient involvement in the development stage.<sup>7</sup> This has been compared with the Hospital Consumer Assessment of Healthcare Providers and Systems survey used by Press Ganey in the United States, which has been extensively developed.<sup>8</sup>

The development of a patient-satisfaction tool requires a step-wise psychometric process and subsequent validation in practice, and due to the multidimensional and complex nature of satisfaction, questionnaires should use multiple items to investigate specific events.<sup>9</sup> The steps generally involved in the psychometric development of a questionnaire

are described in table 1. In the "satisfaction" field there is no "definitive standard" to compare with (criterion validity), so to guarantee validity of the questionnaires, a thorough item-generation process is required to ensure content and face validity. Results can then be correlated with other factors suspected to be associated with the topic, known as construct validity. Measuring the internal consistency of the questionnaire may also enhance the validity. Items within a dimension should correlate, and the individual dimensions should have a Cronbach  $\alpha$  greater than the overall result.<sup>10</sup>

Quality of recovery<sup>11</sup> is sometimes joined with patient satisfaction and quality of life to provide "patient-centered" outcomes.<sup>5</sup> Previous work has comprehensively reviewed the literature on quality-of-recovery scores<sup>12,13</sup> and found there to be at least two suitable instruments available. However, systematic evaluations of instruments used to measure patient satisfaction after anesthesia, have been limited to two particular clinical settings: ambulatory anesthesia<sup>14</sup> and regional anesthesia;<sup>15</sup> both reviews demonstrated a paucity

**Table 1.** Psychometric Construction and Evaluation of a Questionnaire<sup>1,5</sup>

|                                                     |                                                                                                                                                                                                                                                                                                                                                                                                                                                                                                                                                                                                                                                                                                                                                                                                |
|-----------------------------------------------------|------------------------------------------------------------------------------------------------------------------------------------------------------------------------------------------------------------------------------------------------------------------------------------------------------------------------------------------------------------------------------------------------------------------------------------------------------------------------------------------------------------------------------------------------------------------------------------------------------------------------------------------------------------------------------------------------------------------------------------------------------------------------------------------------|
| Item generation and dimensions                      | Involves gathering the opinions of patient-focus groups, anesthetists, and reviews of the current literature, to define items that are considered significant. These items are then divided into separate dimensions, with the subsequent development of a pilot questionnaire.                                                                                                                                                                                                                                                                                                                                                                                                                                                                                                                |
| Testing of pilot questionnaire                      | The pilot questionnaire is then tested to assess its reliability, validity, and ease of understanding. At this stage, a number of items may be removed, if found to be ambiguous or superfluous.                                                                                                                                                                                                                                                                                                                                                                                                                                                                                                                                                                                               |
| Retesting of pilot questionnaire                    | The pilot questionnaire is then retested in another group of patients in the form of face-to-face interviews, written mail, and/or telephonic questionnaires. Biases related to sociodemographic status, social desirability (answering the questions in order to please the investigator, rather than giving their true opinion), and nonrespondent bias can all be addressed.                                                                                                                                                                                                                                                                                                                                                                                                                |
| Validity                                            | Multifaceted concept. Includes content validity, which ensures that the important components regarding satisfaction are included, and face validity, where the assessors ensure that the items measure what they are intended to. Criterion validity assesses the new measure against a current definitive standard. Construct validity asks whether the questions are constructed to ensure a valid result and includes convergent and discriminant validity. Convergent validity describes correlation with other factors measuring similar aspects, whereas discriminant validity should ensure that dissimilar factors are not correlated.                                                                                                                                                 |
| Reliability                                         | Reliability is the consistency of results. Internal consistency is measured using Cronbach $\alpha$ , which is a value correlating the items, ensuring that they all measure the same thing within a dimension. If the Cronbach $\alpha$ is 0, there is no correlation between the questions, and the maximum possible value is 1. The result should be between 0.7 and 0.9. If the value is >0.9, it may indicate that the questionnaire is too small in range. Test-retest reliability is when the test is performed on the same patient on >1 occasion. The correlation coefficient of the test results should be >0.7. Inter- and intrarater agreements are how accurately different observers agree with each other, and how accurately the same observer agrees over time, respectively. |
| Acceptability                                       | Measures of acceptability include the time to complete the questionnaire and the response rate. Different routes of administration of the questionnaire can affect the response rate, <sup>84</sup> which may also affect the validity of the questionnaire. Nonresponder bias deals with the potential differences between those who are highly satisfied and those who are poorly satisfied, and their participation in answering the questionnaire. <sup>5</sup>                                                                                                                                                                                                                                                                                                                            |
| Retest "final" questionnaire in new patient samples | This provides further assessment of validity and reliability, and reassesses confounding variables.                                                                                                                                                                                                                                                                                                                                                                                                                                                                                                                                                                                                                                                                                            |

of appropriately validated tools. To our knowledge, there is no published evidence synthesis of instruments used to measure patient satisfaction with anesthesiology in general. Given the importance of using validated outcome measures, and the increasing focus on patient-centered outcomes in both research and clinical practice, this represents an important gap in the literature. Therefore, we have undertaken a qualitative systematic review, to answer the question: “What instruments have been psychometrically developed to measure patient satisfaction with anesthesia, and what is their validity?” The purpose of this review is to qualitatively appraise the literature and provide guidance about the strengths and limitations of patient-satisfaction tools that may be used for quality improvement and research purposes.

## Methods

We have adhered to the Preferred Reporting Items for Systematic Reviews and Meta-Analyses statement standards in this article.<sup>16</sup>

### Data Sources

We searched the online databases MEDLINE and Embase and ISI Web of Science (all database search) for articles published between January 1, 1980 and March 1, 2012 without language exclusion, but limited to human studies. The search strategy included snowballing of references and manual searching of citation lists, which is detailed in appendix 1.

### Inclusion/Exclusion Criteria

For the purposes of this review, a “patient-satisfaction questionnaire” was defined as an instrument that was developed using psychometric techniques, and that consisted of at least two distinct dimensions. We included all studies that used a questionnaire developed in this way to assess patient satisfaction with some aspect of anesthesia: these included studies of pediatric patients and parental satisfaction, satisfaction with general anesthesia, local anesthesia, ambulatory anesthesia, and regional anesthesia. In order to avoid repeating previously published work, we have focused on measures of “patient satisfaction” and therefore, have excluded studies describing the development or validation of “quality of recovery” indicators. We also excluded questionnaires that were developed to measure satisfaction with sedation or satisfaction solely with pain management.

### Data Extraction

We reported the characteristics and quality of every article by extracting the following information: year and country of origin, number of patients recruited into study, number of dimensions within the score, number and nature of the items within each dimension, the response format, the type of anesthesia and surgery being evaluated, and the results of the study as reported by the authors.

For every satisfaction measure we identified, we evaluated the rigor of the original psychometric construction and

evaluation process by assessing how the authors reported the questionnaire development process, pilot testing, and the validity, reliability, and acceptability of each instrument. The criteria we have used for assessing validity is based on methodological descriptions of thorough item generation as well as authors claims. We were unable to find a published system for comparing the quality of the psychometric development processes for questionnaires in a structured and objective manner. Therefore, we have reported our evaluation of the psychometric development reported in each article, by dividing the process into three phases: (1) item generation and pilot testing, (2) validation and reliability, and (3) acceptability to patients, including response rate and completion time. Each questionnaire was then scored on a scale of 0 to 2 in each category, with a maximum achievable score of 6. Although this scoring system was not previously validated, it gives an indication of the depth of psychometric development and testing behind each questionnaire.

## Results

The search identified 18,665 studies. Two authors independently screened the titles and abstract, and 15,454 articles were excluded. Three authors reviewed the full texts of the remaining 3,211 articles; manual searching of reference lists (snowballing) revealed a further 58 articles. Articles that excluded were 3,118 as they did not describe instruments that met our definition of a patient-satisfaction questionnaire. Of the remaining 150 articles, 79 were excluded as they did not use a questionnaire which met our criteria for psychometric development. Therefore, our final analysis consists of 71 articles describing a total of 34 patient-satisfaction scores, developed and evaluated using psychometric testing (fig. 1). Questionnaires meeting our inclusion criteria were not published before 1990, however, 6 were from the 1990s, and 28 were between 2000 and 2012 March.

Our description of the original articles developing each of these 34 patient-satisfaction tools is listed by clinical specialty in tables 2–7. We have reported the details of the psychometric evaluation process and scored the presence of item generation, validity and reliability, and acceptability for each of these studies in table 8. A list of studies which have subsequently used any one of these 34 questionnaires is provided in appendix 2. Below, we report a summary of the overall results and descriptions of the highest quality studies in each category.

### Maternal Satisfaction (table 2)

We found three studies, which used questionnaires that had been psychometrically developed to measure maternal satisfaction with obstetric care: two were used following cesarean section, and one assessed maternal satisfaction after neuraxial blockade for labor analgesia. Of these, one<sup>17</sup> involved patients in the questionnaire design and

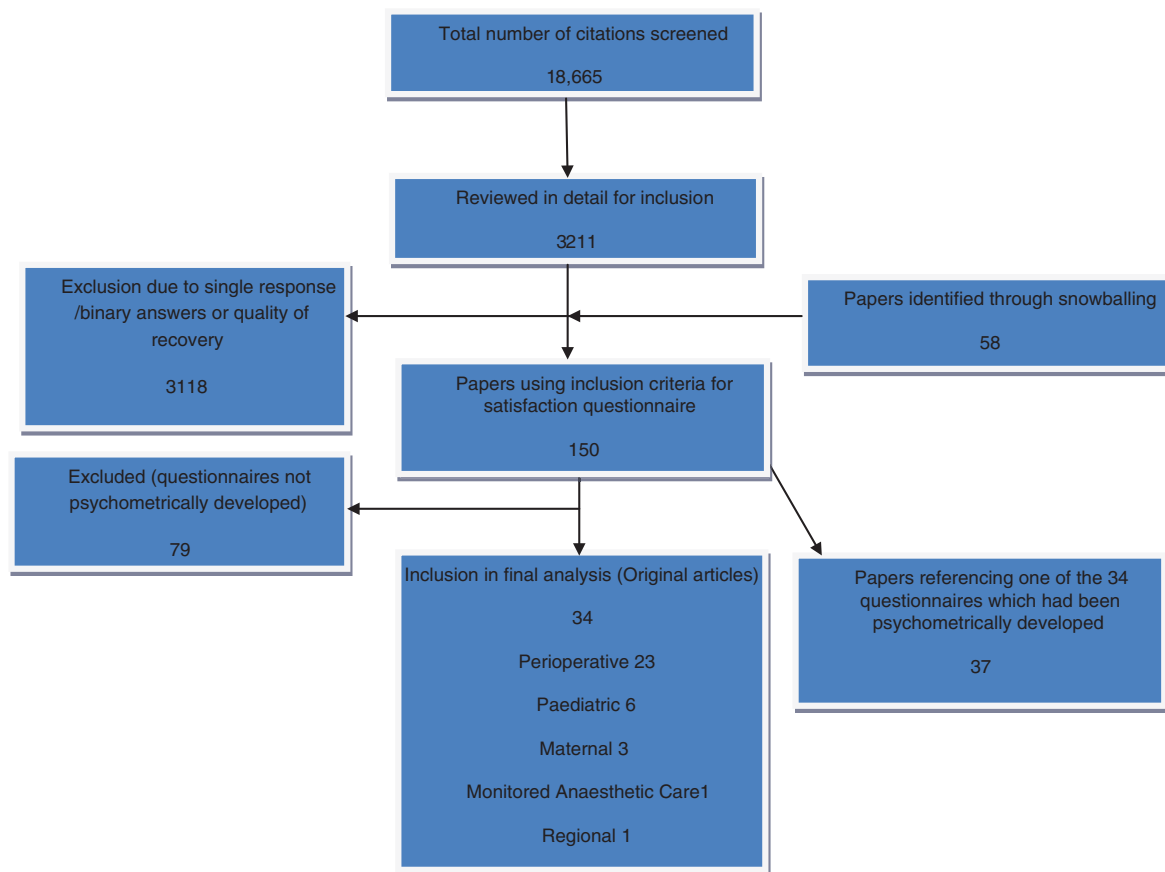

Fig. 1. Flowchart demonstrating systematic review process.

development process and two did not.<sup>18,19</sup> Morgan *et al.*<sup>17</sup> used a clearly defined psychometric development and evaluation process, a 22-item questionnaire, which they named the Maternal Satisfaction Scale for Cesarean Section. Hobson *et al.*<sup>20</sup> validated the Maternal Satisfaction Scale for Cesarean Section using a different distribution format to the original development article; Sindhvananda *et al.*<sup>18</sup> used the most objectively robust development and validation process (scoring 5 out of 6 on our assessment); however, their report was published in 2002,<sup>21</sup> and their questionnaire has not subsequently been used in any other published studies.

### Regional Anesthesia (table 3)

Although there were many studies which included satisfaction with general and regional anesthetics, we could find only one French article, which used a psychometric development and evaluation process, to construct a questionnaire measuring satisfaction with regional anesthesia in the nonobstetric setting.<sup>22</sup> Despite a growing literature evaluating the efficacy and outcomes of regional anesthesia, this instrument has subsequently been used in only one other study.<sup>23</sup> This lack of validated tools for measuring satisfaction with regional anesthesia was also reported by Wu *et al.*<sup>15</sup> in their systematic review of this field of practice.

### Monitored Anesthetic Care (table 4)

The American Society of Anesthesiologists defines Monitored Anesthetic Care as the delivery of local anesthesia together with sedation and analgesia for a planned procedure. The most referenced instrument assessing satisfaction with Monitored Anesthetic Care is the Iowa Satisfaction with Anesthesia Scale (ISAS), consisting of 11 questions;<sup>24</sup> this scored highly (6 out of 6) in our objective appraisal of the development process.

We found a further 17 studies using the ISAS to assess satisfaction. Eight of these used the ISAS for satisfaction with ophthalmology procedures;<sup>25–32</sup> only one of these studies<sup>28</sup> performed further validation of the scale within their patient cohorts. The remaining studies used the ISAS to assess satisfaction with Monitored Anesthetic Care for other procedures and surgery.<sup>33–37,38–40</sup>

### Pediatrics (table 5)

We identified six tools used in pediatric anesthesia, which had undergone psychometric development.<sup>41–46</sup> Kain *et al.*<sup>44</sup> developed an 11-item questionnaire using a three-step approach starting with validity testing in the form of items grouping using input from anesthesiologists, surgeons, psychologists, play specialists, and nurses. A rigorous protocol and psychometric evaluation was recently

**Table 2.** Questionnaires Developed to Measure Satisfaction in Obstetric Anesthesia

| Author                                   | Country of Origin | Tool                                                                             | No. of Questions | No. of Dimensions | Dimensions                                                                                                                   | Response Format                                              | No. of Patients | Surgery                   | Anesthesia              | Results                                                                                                        |
|------------------------------------------|-------------------|----------------------------------------------------------------------------------|------------------|-------------------|------------------------------------------------------------------------------------------------------------------------------|--------------------------------------------------------------|-----------------|---------------------------|-------------------------|----------------------------------------------------------------------------------------------------------------|
| Morgan <i>et al.</i> <sup>17</sup>       | Canada            | MSSCS 22 items—7-point Likert scale                                              | 22               | 4                 | Communication and control, anesthetic effects, postoperative problems, side effects                                          | Interview, pre- and postprocedure (for item generation only) | 115             | Cesarean section          | Regional                | Development of valid, reliable, maternal-satisfaction scale for women undergoing nonemergency cesarean section |
| Sindhvananda <i>et al.</i> <sup>18</sup> | Thailand          | Questionnaire, 11 items, 0–10 VAS                                                | 11               | 4                 | Procedure, hypotension, postoperative events, and quality of anesthesia                                                      | Interview in PACU or ward 24–48 h after surgery              | 114             | Elective cesarean section | Spinal or epidural      | Validation of scale to assess patient satisfaction with regional for cesarean section                          |
| Nikkola <i>et al.</i> <sup>19</sup>      | Finland           | Questionnaire, 44 items, pain VAS at three stages of labor, 4-point Likert scale | 44               | 6                 | Pain, control, relationship with spouse, fears, and expectations, emotions after delivery, physical condition after delivery | 1 day after delivery                                         | 90              | Labor analgesia           | Epidural PCEA vs. bolus | Minimal steps taken to ensure a valid tool to assess patient satisfaction with labor analgesia                 |

MSSCS = Maternal Satisfaction Scale for Caesarean Section; PACU = postanesthetic care unit; PCEA = patient-controlled epidural analgesia; VAS = visual analog scale.

**Table 3.** Questionnaires Developed to Measure Satisfaction with Regional Anesthesia

| Author                                 | Country of Origin | Tool                                                                                                                     | No. of Questions | No. of Dimensions | Dimensions (No. of Questions in Each)                                                                               | Response Format                                                                | No. of Patients Initially Recruited | Surgery                                                  | Anesthesia                           | Results                                                                                               |
|----------------------------------------|-------------------|--------------------------------------------------------------------------------------------------------------------------|------------------|-------------------|---------------------------------------------------------------------------------------------------------------------|--------------------------------------------------------------------------------|-------------------------------------|----------------------------------------------------------|--------------------------------------|-------------------------------------------------------------------------------------------------------|
| Montenegro <i>et al.</i> <sup>22</sup> | France            | Questionnaire, 2 institutions<br>Seven questions day 1.<br>Nine questions day 8.<br>Nine questions open-ended and Likert | Seven            | 3                 | Information, pain, and anxiety during procedure, overall satisfaction. Side effects included in day-8 questionnaire | Telephone interview day 1 and day 8 by pharmacist student not involved in care | 314                                 | Orthopedics and trauma, elective, day case, or emergency | Local/regional anesthesia ± sedation | Development and validation of a patient questionnaire to assess satisfaction with regional anesthesia |

**Table 4.** Questionnaires Developed to Measure Satisfaction with MAC

| Author                             | Country of Origin | Tool                                                                                   | No. of Questions | No. of Dimensions   | Dimensions (No. of Questions in Each)                                                                                                                               | Response Format                                                                       | No. of Patients Initially Recruited | Surgery                                                                                            | Anesthesia Results                                                                                                                           |
|------------------------------------|-------------------|----------------------------------------------------------------------------------------|------------------|---------------------|---------------------------------------------------------------------------------------------------------------------------------------------------------------------|---------------------------------------------------------------------------------------|-------------------------------------|----------------------------------------------------------------------------------------------------|----------------------------------------------------------------------------------------------------------------------------------------------|
| Dexter <i>et al.</i> <sup>24</sup> | United States     | ISAS, 11 questions – 6-point Likert scale (bipolar, symmetrical summated rating scale) | 11               | No specific domains | Nausea and vomiting, same anesthetic again, itch, relaxed, pain, safe, comfort/temperature, satisfaction with anesthetic care, pain during surgery, felt good, hurt | Written, 15 min after phase 2 PACU, some also repeated within 1 h or the next morning | 94                                  | Inpatient and day surgery. Ophthalmology, plastics, brain biopsy, GI, ENT, orthopedics, gynecology | MAC<br>Development of reliable, internally consistent, and valid measure of patient satisfaction with MAC (not the perioperative experience) |

ENT = ear, nose, and throat; GI = gastrointestinal; ISAS = Iowa Satisfaction with Anaesthesia Scale; MAC = Monitored Anesthetic Care; PACU = postanesthetic care unit.

**Table 5.** Questionnaires Developed to Measure Satisfaction with Pediatric Anesthesia Care (Patient and/or Parental)

| Author                           | Country of Origin | Tool                                                                    | No. of Questions                                                    | No. of Dimensions     | Dimensions (No. of Questions in Each)                                                                                                                   | Response Format | No. of Patients Initially Recruited | Surgery                                                              | Anesthesia Results                                                                                                                                                                   |
|----------------------------------|-------------------|-------------------------------------------------------------------------|---------------------------------------------------------------------|-----------------------|---------------------------------------------------------------------------------------------------------------------------------------------------------|-----------------|-------------------------------------|----------------------------------------------------------------------|--------------------------------------------------------------------------------------------------------------------------------------------------------------------------------------|
| Chan <i>et al.</i> <sup>41</sup> | China             | Parental Satisfaction with Care questionnaire (translated from Chinese) | 18 questions, 1–5 Likert scale plus overall satisfaction rated 0–10 | No specific dimension | Opinion of parental presence on induction, visitation in recovery, performance of operating staff-adequacy, relevancy, and understanding of information | NA              | 50 parents                          | Pediatric (aged 1–9), elective urology, hernia, ENT, plastic surgery | GA<br>Assessed pediatric parental anxiety and satisfaction with overall theatre care, which included anaesthesia. Educational program improves satisfaction and anxiety for parents. |

(Continued)

Table 5. (Continued)

| Author                                | Country of Origin | Tool                                                                                                          | No. of Questions                                                                                      | No. of Dimensions | Dimensions (No. of Questions in Each)                                                                                                                                                                                                                                                                                                                                                                                                                                                                     | Response Format                            | No. of Patients Initially Recruited | Surgery                                                                           | Anesthesia | Results                                                                                                                                                            |
|---------------------------------------|-------------------|---------------------------------------------------------------------------------------------------------------|-------------------------------------------------------------------------------------------------------|-------------------|-----------------------------------------------------------------------------------------------------------------------------------------------------------------------------------------------------------------------------------------------------------------------------------------------------------------------------------------------------------------------------------------------------------------------------------------------------------------------------------------------------------|--------------------------------------------|-------------------------------------|-----------------------------------------------------------------------------------|------------|--------------------------------------------------------------------------------------------------------------------------------------------------------------------|
| Tait <i>et al.</i> <sup>42</sup>      | United States     | Questionnaire                                                                                                 | 30 questions, 5-point and 4-point Likert scale responses and VAS for anxiety and overall satisfaction | 3                 | Preferences (11), concerns (11), satisfaction (8)                                                                                                                                                                                                                                                                                                                                                                                                                                                         | Telephone interview day 1 post-operatively | 331                                 | Pediatrics elective                                                               | GA         | Parents preferred shared decision-making with the anesthetist. Instrument developed to measure parental satisfaction with decisions regarding pediatric anesthesia |
| Iacobucci <i>et al.</i> <sup>43</sup> | Italy             | Questionnaire, 2 parts; parent—6 item, 10-point Likert scale; child—9 items, 8 dichotomous, 1 multiple choice | 6 questions for parent, 9 questions for children                                                      | 5                 | Quality of communication, quality of environment, quality of care by anesthetists, parental opinion of child's recollection, parental opinion of overall experience, parent (dialog, comfort in environment, affection and care by nurses, quality of anesthetists observation postop, emotional judgment, child (preop fear, anesthetists' effect on fear, operating room, induction, calming effect of anesthetists on induction, presence of pleasant staff, and disturbing objects, greatest anxiety) | Written, on return to ward post-procedure  | 214                                 | Pediatric, inpatients (aged 23 days to 15 yr), minor abdominal or genitor-urinary | GA         | Development and validation of questionnaire to measure parental and child satisfaction                                                                             |

(Continued)

Table 5. (Continued)

| Author                             | Country of Origin | Tool                                                         | No. of Questions | No. of Dimensions   | Dimensions (No. of Questions in Each)                                                                                                                                       | Response Format                                                                                                              | No. of Patients Initially Recruited | Surgery                                                         | Anesthesia                  | Results                                                                                                                                                                                                  |
|------------------------------------|-------------------|--------------------------------------------------------------|------------------|---------------------|-----------------------------------------------------------------------------------------------------------------------------------------------------------------------------|------------------------------------------------------------------------------------------------------------------------------|-------------------------------------|-----------------------------------------------------------------|-----------------------------|----------------------------------------------------------------------------------------------------------------------------------------------------------------------------------------------------------|
| Kain <i>et al.</i> <sup>44</sup>   | United States     | Questionnaire, 21 item—5 cm VAS                              | 21 questions     | No specific domains | Overall satisfaction with function of children's hospital, surgery center, anesthesiologists, surgeons, and nurses. Overall satisfaction with quality of separation process | Written, on discharge from recovery, 2 weeks postoperatively                                                                 | 103                                 | Pediatrics (aged 2–8)                                           | NA                          | Assessment of parental satisfaction. Parents who accompany children to operating room were less anxious and more satisfied. Parental satisfaction significantly higher in cases where premedication used |
| Khour <i>et al.</i> <sup>45</sup>  | Canada            | Questionnaire, 23 items, dichotomous and free-text responses | 23 questions     | 5                   | State of information, organizational issues, anxiety, pain, and discomfort, and medication side effects                                                                     | Parents and patients. Written first part during waiting time for procedure. Second part after procedure and before discharge | 157                                 | Pediatrics (aged 1 month to 19 yr), gastroscopy and colonoscopy | GA (<10 yr old) IV sedation | Development and validation of pediatric endoscopy service satisfaction instrument                                                                                                                        |
| Schiff <i>et al.</i> <sup>46</sup> | Germany           | Pediatric perianesthesia questionnaire                       | 37               | 5                   | Treatment of discomfort (7), privacy/waiting (10), information giving (7), discomfort (9), treatment pain (4)                                                               | 6–48 h after returning to ward. Postal return or collected by research assistant                                             | 1,052                               | Pediatrics, elective, minor to major surgery                    | GA/RA                       | Psychometric questionnaire to assess pediatric patient satisfaction with anesthetic care                                                                                                                 |

ENT = ear, nose, and throat; GA = general anesthesia; iv = intravenous; NA = not applicable; RA = regional anesthesia; VAS = visual analog scale.



**Table 6.** Questionnaires Developed to Measure Satisfaction with Preassessment

| Author                                   | Country of Origin | Tool                                                                                                                                                         | No. of Questions | No. of Dimensions | Dimensions (No. of Questions in Each)                              | Response Format                                                                  | No. of Patients Initially Recruited | Surgery               | Anesthesia    | Results                                                                                                                                                                                                                                                                                                                          |
|------------------------------------------|-------------------|--------------------------------------------------------------------------------------------------------------------------------------------------------------|------------------|-------------------|--------------------------------------------------------------------|----------------------------------------------------------------------------------|-------------------------------------|-----------------------|---------------|----------------------------------------------------------------------------------------------------------------------------------------------------------------------------------------------------------------------------------------------------------------------------------------------------------------------------------|
| Harms <i>et al.</i> <sup>85</sup>        | Switzerland       | Questionnaire, 86 items, 11 items on 6-point scale for preop visit satisfaction, Spielberger-State-Anxiety Score, 12 items using 10-cm VAS for preop anxiety | 86               | 3                 | Preop visit, patient preop anxiety, perception of anesthesiologist | Written, up to 3 months pre- and postop                                          | 1,338                               | NA                    | NA            | Modified Delphi procedure to construct the questionnaire. Anxiety measures validated, but unknown reliability and validity for measures of preoperative visit. Overall preop visit satisfaction: 78–79%. Training anesthesiologists in communication skills can improve patient satisfaction with preop visits (not significant) |
| Hering <i>et al.</i> <sup>86</sup>       | United States     | NA                                                                                                                                                           | NA               | NA                | Satisfaction with preoperative anesthetic experience               | Before discharge                                                                 | 64                                  | Elective, day surgery | GA            | To assess whether a Web site enhances information acquisition, influences preoperative anxiety and overall patient satisfaction. No significant difference was found                                                                                                                                                             |
| Mercer <i>et al.</i> <sup>50</sup>       | United Kingdom    | CARE measure, 10 items, 5-point Likert scale                                                                                                                 | 10               | NA                | Pre-op assessment consultation                                     | Written, immediately after preoperative assessment anesthesiologist consultation | 1,582                               | NA                    | NA            | Feasibility study of previously validated tool used in other clinical settings. Measure of communication and empathy of clinical consultation and not technical skills. May have use in anesthetics                                                                                                                              |
| Snyder-Ramos <i>et al.</i> <sup>48</sup> | Germany           | Questionnaire evaluating preanesthetic visit, 12 questions 6-point scale (–3 to +3) or 4 multiple-choice questions                                           | 12               | 2                 | Patient satisfaction (6) and information gained (6)                | Written, inpatient, evening of preassessment (before premedication)              | 104                                 | General and vascular  | Preassessment | Development and validation of a preassessment satisfaction questionnaire                                                                                                                                                                                                                                                         |

CARE = Consultation and Relational Empathy; GA = general anesthesia; NA = not applicable; VAS = visual analog scale.

**Table 7.** Questionnaires Developed to Measure Satisfaction with Perioperative Care

| Author                                 | Country of Origin | Tool                                                                                                         | No. of Questions | No. of Dimensions | Dimensions (No. of Questions in Each)                                              | Response Format                                                 | No. of Patients Initially Recruited          | Surgery                                                                                                                                                  | Anesthesia                                    | Results                                                                                                                                                                               |
|----------------------------------------|-------------------|--------------------------------------------------------------------------------------------------------------|------------------|-------------------|------------------------------------------------------------------------------------|-----------------------------------------------------------------|----------------------------------------------|----------------------------------------------------------------------------------------------------------------------------------------------------------|-----------------------------------------------|---------------------------------------------------------------------------------------------------------------------------------------------------------------------------------------|
| Albaladejo <i>et al.</i> <sup>87</sup> | France            | Questionnaire, 25 questions 5-point Likert scale                                                             | 25               | 4                 | Structure (8), physician behavior (6), information (5), well-being (6)             | On discharge, written, mailed back                              | 176                                          | Elective, gastrointestinal, urology, orthopedic, ophthalmology, neurosurgery, ENT, dental, others                                                        | GA                                            | Information booklet increases satisfaction with preanesthetic visit                                                                                                                   |
| Auquier <i>et al.</i> <sup>51</sup>    | France            | Questionnaire—EVAN 25 questions 0–100 scale                                                                  | 25               | 6 + global score  | Anxiety, embarrassment, fear, pain discomfort, information, physical needs         | Postop, within 24 h, written                                    | 742                                          | Elective non-day-case surgery mixed (except obstetrics)                                                                                                  | GA ± regional                                 | Initial construction and validation study for EVAN-G questionnaire                                                                                                                    |
| Auquier <i>et al.</i> <sup>62</sup>    | France            | Questionnaire—EVAN-G 26 questions, 5-point Likert scale scores transformed into 0–100 scale for satisfaction | 26               | 6 + global index  | Attention (5), privacy (4), information (5), pain (5), discomfort (5), waiting (2) | Within 48 h, before discharge, written                          | 977, multi-center (8 anesthetic departments) | Gynecological, GI, orthopedic, ENT, vascular, endocrine, endoscopic, aesthetic, urology, neurosurgical, maxillofacial, ophthalmology, thoracic, day case | GA (exclusion of MAC and regional anesthesia) | Final psychometric validation of EVAN-G questionnaire (highest score in discomfort, lowest score in information, significantly greater satisfaction scores for patients aged > 65 yr) |
| Bauer <i>et al.</i> <sup>63</sup>      | Germany           | 15-item written questionnaire vs. face-to-face interview. Semichotomous scale or 4-item scale                | 15               | 2                 | Discomfort (10) and anesthesia care (5)                                            | Postoperative day 2, written or standardized personal interview | 700                                          | Elective inpatient, general, vascular, trauma, urology, ENT, gynecology                                                                                  | GA                                            | A valid questionnaire used for either a standardized interview or written questionnaire. Questions answered in a more critical manner during an interview, improving quality control  |

(Continued)

Table 7. (Continued)

| Author                              | Country of Origin | Tool                                               | No. of Questions | No. of Dimensions | Dimensions (No. of Questions in Each)                                                                                                                                                                                                                                            | Response Format                                              | No. of Patients Initially Recruited | Surgery                                                                                        | Anesthesia        | Results                                                                                                                                                                                                                                     |
|-------------------------------------|-------------------|----------------------------------------------------|------------------|-------------------|----------------------------------------------------------------------------------------------------------------------------------------------------------------------------------------------------------------------------------------------------------------------------------|--------------------------------------------------------------|-------------------------------------|------------------------------------------------------------------------------------------------|-------------------|---------------------------------------------------------------------------------------------------------------------------------------------------------------------------------------------------------------------------------------------|
| Caljouw <i>et al.</i> <sup>56</sup> | The Netherlands   | Questionnaire—LPPSq, 39 items 5-point Likert scale | 39               | 6                 | Information (4), professional competence with discomfort and needs (7), fear and concern (7), staff-patient relationship (14), professional competence with problems (4), service (3)                                                                                            | Written, pre-discharge, within 2 days postoperatively        | 382                                 | Elective, general surgical, gynecological, orthopedic, urological, obstetrics, plastic surgery | GA, GA + regional | Information and relationship between staff and patients were major determinants of satisfaction. LPPSq developed based on EVAN questionnaire, with inclusion of staff-patient relationship dimension and expansion of information dimension |
| Capuzzo <i>et al.</i> <sup>52</sup> | Italy             | Questionnaire—NRS 10 questions 0–10 rating         | 10               | 3                 | Physical (2)—pain, nausea, and vomiting; emotional (4)—feeling of well-being, feeling safe, feeling relaxed, feeling anxious, or frightened; relational (4)—information given by anesthetist, attention to the patient, kindness/regard of caregivers, demands promptly answered | Face-to-face interview late morning second postoperative day | 219                                 | Inpatient abdominal, thoracic, surface surgery                                                 | GA 93.6%          | High value to emotional and interpersonal relationships                                                                                                                                                                                     |

(Continued)

Table 7. (Continued)

| Author                               | Country of Origin | Tool                                                                                                                                                                                                           | No. of Questions | No. of Dimensions   | Dimensions (No. of Questions in Each)                                                                                                                                                                                                                                            | Response Format                                                                                | No. of Patients Initially Recruited | Surgery                                                                                              | Anesthesia                                       | Results                                                                                                                                                                                                                       |
|--------------------------------------|-------------------|----------------------------------------------------------------------------------------------------------------------------------------------------------------------------------------------------------------|------------------|---------------------|----------------------------------------------------------------------------------------------------------------------------------------------------------------------------------------------------------------------------------------------------------------------------------|------------------------------------------------------------------------------------------------|-------------------------------------|------------------------------------------------------------------------------------------------------|--------------------------------------------------|-------------------------------------------------------------------------------------------------------------------------------------------------------------------------------------------------------------------------------|
| Capuzzo <i>et al.</i> <sup>65</sup>  | Italy             | Multicenter, questionnaire 0–10 NRS, 10 questions (previously developed tool) plus perceived health on NRS 0–10. Further information on sociodemographics and pre- and postoperative visits by anesthesia team | 10               | 3                   | Physical (2)—pain, nausea, and vomiting; emotional (4)—feeling of well-being, feeling safe, feeling relaxed, feeling anxious, or frightened; relational (4)—information given by anesthetist, attention to the patient, kindness/regard of caregivers, demands promptly answered | Face-to-face interview or via written questionnaire. Median time 1 day except center E, 2 days | 1,506                               | Inpatient orthopedic, urological, abdominal, endocrine, vascular, gynecological, thoracic, and other | GA regional, GA + regional                       | In patient satisfaction improved by: nurses dedicated to anesthesia, written information sheet, and enhanced postoperative visits                                                                                             |
| Fleisher <i>et al.</i> <sup>88</sup> | United States     | Questionnaire, 6 questions—mixed Likert and open responses                                                                                                                                                     | 6                | No specific domains | Type of anesthesia, explanation, satisfaction, rate quality of anesthetic care, any improvements, enough information to inform future anesthetist of aspects that need improvement?                                                                                              | Written, in discharge pack. If no reply in 2 weeks contacted by research team                  | 372                                 | Day surgery adult and pediatric (if <18 yr old then parents completed form)                          | GA, epidural, MAC, spinal, regional block, other | Anesthesiology consultant report with information regarding their anesthetic care improves perception of quality of care                                                                                                      |
| Fung <i>et al.</i> <sup>59</sup>     | United States     | Questionnaire, 36 items, four sets of nine items corresponding to four temporal phases of outpatient anesthesia care. Patients were required to rank the top three items in each group. Two sites              | 36               | 4                   | Preoperative, operating room, pre- and postdischarge. Covering the dimensions: physical structure, technical content, interpersonal relationships, efficiency, outcomes of care                                                                                                  | Written, mailed back, day 3 postop. Telephonic follow-up day 4–7 to improve response rate      | 45                                  | Day surgery, gynecological, orthopedic, ENT, plastic surgery, general surgery, other                 | GA                                               | Compared patient ranking with anesthetists ranking of important values. Patients value the place of communication and provision of information at all phases of their outpatient anesthesia experience. Anesthetists differed |

(Continued)

Table 7. (Continued)

| Author                                | Country of Origin | Tool                                                                                                  | No. of Questions | No. of Dimensions           | Dimensions (No. of Questions in Each)                                                                                                                                                                        | Response Format                                     | No. of Patients Initially Recruited | Surgery                                                                            | Anesthesia         | Results                                                                                                                                                                                                                                                               |
|---------------------------------------|-------------------|-------------------------------------------------------------------------------------------------------|------------------|-----------------------------|--------------------------------------------------------------------------------------------------------------------------------------------------------------------------------------------------------------|-----------------------------------------------------|-------------------------------------|------------------------------------------------------------------------------------|--------------------|-----------------------------------------------------------------------------------------------------------------------------------------------------------------------------------------------------------------------------------------------------------------------|
| Heidegger <i>et al.</i> <sup>53</sup> | Switzerland       | Questionnaire, 29 items—dichotomous problem rating, multi-center                                      | 29               | 6                           | Involvement in decision-making (9), respect/confidence (6), delays (4), nursing care in recovery (2), continuity of care by anesthetist (4), pain management (4)                                             | Written, mailed 1–2 weeks post-discharge            | 3,785                               | NA                                                                                 | GA regional        | Development of a psychometric satisfaction questionnaire. Benchmarked in 6 hospitals in Switzerland and Austria. Problems mainly in areas such as patient information, decision-making, and continuity of care. Summed scores for dimensions better than global score |
| Hüppe <i>et al.</i> <sup>70</sup>     | Germany           | Questionnaire, two parts, 66 questions in total. 4-point Likert scale, ANP                            | 66               | Part 1–3, part 2–3, total 6 | Part 1—symptoms in recovery (20) and first hours on ward (20) and current state (16). Part 2—satisfaction with anesthetic care (4), unspecific perioperative care (4), and postoperative convalescence (2)   | Written, first, second, and third postoperative day | 431                                 | Elective, aged 11–85 yr general surgery, orthopedics, maxillofacial, other         | GA                 | Development of the ANP                                                                                                                                                                                                                                                |
| Hüppe <i>et al.</i> <sup>71</sup>     | Germany           | Modified ANP after initial study, questionnaire, 2 parts, 46 questions in total, 4-point Likert scale | 46               | Part 1–2, part 2–3          | Part 1—postoperative period (recovery and first hours on ward) (19), current time (17). Part 2—satisfaction with anesthetic care (4), unspecific perioperative care (4), and postoperative convalescence (2) | Written day 1                                       | 1,490                               | Elective >18 yr, general surgery, orthopedics, and trauma, plastic surgery, others | GA, regional, both | Reliability and validity of the ANP                                                                                                                                                                                                                                   |

(Continued)

Table 7. (Continued)

| Author                              | Country of Origin | Tool                                                                                                                              | No. of Questions                              | No. of Dimensions  | Dimensions (No. of Questions in Each)                                                                                                 | Response Format                                                                   | No. of Patients Initially Recruited | Surgery                                       | Anesthesia  | Results                                                                                                                                                                                                                           |
|-------------------------------------|-------------------|-----------------------------------------------------------------------------------------------------------------------------------|-----------------------------------------------|--------------------|---------------------------------------------------------------------------------------------------------------------------------------|-----------------------------------------------------------------------------------|-------------------------------------|-----------------------------------------------|-------------|-----------------------------------------------------------------------------------------------------------------------------------------------------------------------------------------------------------------------------------|
| Hüppe <i>et al.</i> <sup>72</sup>   | Germany           | ANP modified for cardiac surgery                                                                                                  | 46                                            | Part 1—2, part 2—2 | Differences to part 1—after waking from anesthesia and first hours after. Part 2—no questions regarding unspecific postoperative care | Between day 1 and day 8                                                           | 1,688                               | Elective, multicenter, cardiothoracic surgery | GA          | Practicability and validity of ANP-KA (cardiac) for assessment of postoperative patient satisfaction after cardiac surgery                                                                                                        |
| Jala <i>et al.</i> <sup>57</sup>    | United Kingdom    | English adaptation of LPPSq (extended from original to include common anesthetic side effects), 39 items—varying graded responses | 39                                            | 6                  | Information provision, discomfort and needs, fear and concern, staff-patient relationship, professional competence, service quality   | Written, up to 24h preop and returned up to 3 days postop in a survey returns box | 100                                 | Elective orthopedic surgery                   | GA regional | English adaptation of LPPSq. High overall satisfaction. Lowest satisfaction was with information provided and highest for staff-patient relationships. Patients more satisfied with information provision for regional anesthesia |
| Le May <i>et al.</i> <sup>54</sup>  | Canada            | SOPPCAS, 17-item 6-point Likert scale plus sociodemographic and open-ended questions                                              | 17 (Plus 10 sociodemographic and 3 pen-ended) | 4                  | Patient/anesthetologist interactions, preoccupations related to anesthesia, experience with anesthesia, pain management               | Day 4 postop interview (T1), day 15 postop mailed (T2)                            | 170 at T1 and 133 at T2             | Elective and urgent cardiac surgeries         | GA          | Development of an instrument to measure patients perceptions of cardiac anesthesia services                                                                                                                                       |
| Lockyer <i>et al.</i> <sup>89</sup> | Canada            | Multisource feedback program: 11 questions, 5-point Likert scale                                                                  | 11                                            | 2                  | Professionalism and communication                                                                                                     | NA                                                                                | 30                                  | NA                                            | NA          | Patient survey included within a multisource feedback program                                                                                                                                                                     |

(Continued)

Table 7. (Continued)

| Author                                   | Country of Origin | Tool                                                                               | No. of Questions | No. of Dimensions          | Dimensions (No. of Questions in Each)                                                                                                                    | Response Format                 | No. of Patients Initially Recruited | Surgery                                                                                           | Anesthesia  | Results                                                                                                                                                                                                                                                               |
|------------------------------------------|-------------------|------------------------------------------------------------------------------------|------------------|----------------------------|----------------------------------------------------------------------------------------------------------------------------------------------------------|---------------------------------|-------------------------------------|---------------------------------------------------------------------------------------------------|-------------|-----------------------------------------------------------------------------------------------------------------------------------------------------------------------------------------------------------------------------------------------------------------------|
| Mui <i>et al.</i> <sup>79</sup>          | Taiwan            | PSPACq                                                                             | 30               | 7                          | Information (5), discomfort and needs (4), provider-patient relationship (7), anesthesia-related sequelae (4), fear (3), concern (3), waiting period (4) | Written, 6–48 h postoperatively | 1,100                               | General, Orthopedic, Eye, ENT, Gynecology, Obstetrics                                             | GA RA       | A valid and reliable questionnaire with Taiwanese culture for patients receiving general or regional anesthesia                                                                                                                                                       |
| Schiff <i>et al.</i> <sup>55</sup>       | Germany           | Heidelberg perianesthetic Questionnaire 38 items, 4-point Likert scale multicenter | 38               | 5                          | Trust and atmosphere, fear, discomfort, treatment by personnel, information, and waiting                                                                 | Written, Mean 32 h post-surgery | 1,265                               | Trauma, gastrointestinal, urology, gynecology, neurosurgical/ENT/ophthalmology, thoracic, missing | GA regional | Dissatisfied patients had a median 74% and satisfied patients 92% of the sum score. The Heidelberg perianesthetic questionnaire offers a valid and reliable method to identify dissatisfaction. May assist with quality improvement and is useful as a benchmark tool |
| Sindhvananda <i>et al.</i> <sup>58</sup> | Thailand          | Questionnaire, 10 items, multicenter                                               | 10               | 3 and overall satisfaction | Preadesthetic visit (2), Service in theater (3), Postoperative care (4) plus overall satisfaction (1)                                                    | Written, timing unclear         | 531                                 | Elective general surgery, obstetrics and gynecology, eye, ENT, orthopedic                         | GA          | Validation of satisfaction survey in Thai population                                                                                                                                                                                                                  |

(Continued)

**Table 7.** (Continued)

| Author                             | Country of Origin | Tool                                          | No. of Questions | No. of Dimensions | Dimensions (No. of Questions in Each)                                                                                                                                                                                                                                                                                             | Response Format                         | No. of Patients Initially Recruited | Surgery                                                                 | Anesthesia       | Results                                                                                                                                                                                                     |
|------------------------------------|-------------------|-----------------------------------------------|------------------|-------------------|-----------------------------------------------------------------------------------------------------------------------------------------------------------------------------------------------------------------------------------------------------------------------------------------------------------------------------------|-----------------------------------------|-------------------------------------|-------------------------------------------------------------------------|------------------|-------------------------------------------------------------------------------------------------------------------------------------------------------------------------------------------------------------|
| Tong <i>et al.</i> <sup>48</sup>   | Canada            | Questionnaire<br>NA                           | NA               | NA                | Pain, headache, muscle ache, malaise, drowsiness, dizziness, nausea, vomiting, fever, hoarseness, sore throat, bleeding. Severity evaluated by 4 criteria: pain score: mild, moderate, or severe, functional level 0–100%, medication for symptoms, returned to see a physician. Information given assessed + global satisfaction | Telephonic interview 24 h after surgery | 5,228                               | Ophthalmology, laparoscopy, dilation and curettage, arthroscopy, others | GA, regional MAC | Dissatisfaction with anesthesia is a predictor of global dissatisfaction with ambulatory surgery. The validity of the questions about satisfaction were established in another study (not anesthetic study) |
| Whitty <i>et al.</i> <sup>60</sup> | United Kingdom    | Questionnaire, 44 items, varied Likert scales | 44               | 8                 | Before hospital (3), before operation (14), the operation (8), after the operation (5), at home (1), looking back (8), about yourself (4), open question (1)                                                                                                                                                                      | Written, on discharge                   | 172                                 | Ophthalmology and maxillofacial                                         | GA               | Specific questions about process of care draw responses that go undetected by global satisfaction scales                                                                                                    |

(Continued)



Table 7. (Continued)

| Author                                | Country of Origin | Tool                                                                                                | No. of Questions | No. of Dimensions   | Dimensions (No. of Questions in Each)                                                                                                                                                                                                       | Response Format | No. of Patients Initially Recruited | Surgery                                                        | Anesthesia | Results                                                                                                                                                 |
|---------------------------------------|-------------------|-----------------------------------------------------------------------------------------------------|------------------|---------------------|---------------------------------------------------------------------------------------------------------------------------------------------------------------------------------------------------------------------------------------------|-----------------|-------------------------------------|----------------------------------------------------------------|------------|---------------------------------------------------------------------------------------------------------------------------------------------------------|
| Wilkinson <i>et al.</i> <sup>90</sup> | United Kingdom    | Questionnaire developed from Heidelberg perianesthetic questionnaire 16 items, 4-point Likert scale | 16               | No specific domains | Pleasant environment, friendly, time pressure, enough information, understanding, fear, atmosphere in anesthetic room, anesthetic went as planned, waking up comfortable, pain, sick, hoarseness/sore throat, cold, thirst, recovery, trust | NA              | 147                                 | Elective exclusions: emergency, obstetric, pediatric, ECT, TOP | NA         | Generally satisfied with communication and recovery and trusted anesthetic staff. Dissatisfaction with pain, nausea, sore throat, shivering, and thirst |

ANP-KA = Anesthesiological Questionnaire Cardiac; ECT = electroconvulsive therapy; ENT = ear, nose, and throat; EVAN (G) = Evaluation du Vecu de l'Anesthésie (Generale); GA = general anesthesia; GI = gastrointestinal; LPPSq = Leiden Perioperative care Patient Satisfaction Questionnaire; MAC = Monitored Anesthetic Care; NA = not applicable; NRS = numerical rating score; PSPACq = Patient satisfaction with Perioperative Anesthetic Care; RA = regional anesthesia; SOPPCAS = Scale of Patients' Perceptions of Cardiac Anesthesia Services; TOP = termination of pregnancy.

Table 8. Description of Psychometric Development Process in Original Development Articles

| Author/Instrument                                         | Item Generation            | Pilot Testing | Validity and Reliability Score (0–2)  | Acceptability Score (0–2)                | Total                                                                      |
|-----------------------------------------------------------|----------------------------|---------------|---------------------------------------|------------------------------------------|----------------------------------------------------------------------------|
|                                                           | Item Generation            | Pilot Testing | Validity Tested                       | Reliability Testing (Cronbach $\alpha$ ) | Response Rate (% of Recruited Patients Completing Questionnaire)           |
| Perioperative Auquier <i>et al.</i> <sup>51</sup><br>EVAN | Yes including patients (1) | Yes (1)       | Content (1)                           | 0.59–0.97 (1)                            | 11 ± 8 min (1)<br>>99% (1)                                                 |
| Auquier <i>et al.</i> <sup>62</sup><br>EVAN-G             | Yes including patients (1) | Yes (1)       | Content, convergent, discriminant (1) | 0.73–0.91 (1)                            | 9 ± 7 min (1)<br>89.5% (1)                                                 |
| Capuzzo <i>et al.</i> <sup>62</sup>                       | Yes including patients (1) | Yes (1)       | Content, construct (1)                | 0.84 (1)                                 | Mean 9 min (pilot study) (1)<br>75% (1)                                    |
| Heidegger <i>et al.</i> <sup>53</sup>                     | Yes including patients (1) | Yes (1)       | Content, construct (1)                | 0.43–0.77 (1)                            | NA in final questionnaire<br><20 min (90%) in pilot (1)                    |
| Le May <i>et al.</i> <sup>54</sup><br>SOPPCAS             | Yes including patients (1) | Yes (1)       | Content (1)                           | 0.58 (1)                                 | 15 min for first questionnaire (1)<br>95% for stage 1, 78% for stage 2 (1) |

(Continued)

Table 8. (Continued)

| Author/Instrument                                                                  | Item Generation Score (0–2)                                 |                                              | Validity and Reliability Score (0–2)                                   |                                                                     | Reliability Testing (Cronbach $\alpha$ ) |                                                                      | Acceptability Score (0–2) |  | Total Score (Max 6) |
|------------------------------------------------------------------------------------|-------------------------------------------------------------|----------------------------------------------|------------------------------------------------------------------------|---------------------------------------------------------------------|------------------------------------------|----------------------------------------------------------------------|---------------------------|--|---------------------|
|                                                                                    | Item Generation                                             | Pilot Testing                                | Validity Tested                                                        | Reliability Testing                                                 | Time to Complete                         | Response Rate (% of Recruited Patients Completing Questionnaire)     |                           |  |                     |
| Schiff <i>et al.</i> <sup>55</sup><br>Heidelberg Perianesthetic questionnaire      | Yes including patients (1)                                  | Yes (1)                                      | Content, construct, discriminant (1)                                   | Sum score 0.79 (0.42–0.79) (1)                                      | 12 min (1)                               | 84% (1)                                                              | 6                         |  |                     |
| Bauer <i>et al.</i> <sup>63</sup><br>Caljouw <i>et al.</i> <sup>56</sup><br>LPPSq  | Yes (1)<br>Yes including patients (1)                       | Yes (1)<br>Yes (1)                           | Content (1)<br>Face, content, construct: item-discriminant (1)         | 0.84 (1)<br>0.69–0.94<br>0.9 for total (1)                          | NA (0)<br>NA (0)                         | 84% (1)<br>80.4% (1)                                                 | 5<br>5                    |  |                     |
| Hüppe <i>et al.</i> <sup>71</sup><br>ANP                                           | Yes (1)                                                     | Yes (1)                                      | Content, construct (1)                                                 | 0.76–0.91 (1)                                                       | NA (0)                                   | 74.6% (1)                                                            | 5                         |  |                     |
| Jlala <i>et al.</i> <sup>57</sup>                                                  | Yes including patients (1)                                  | Yes (1)                                      | Construct (1)                                                          | 0.94 (1)                                                            | NA (0)                                   | >90% for pilot<br>74% for comparison study (1)                       | 5                         |  |                     |
| Lockyer <i>et al.</i> <sup>89</sup><br>Mui <i>et al.</i> <sup>79</sup>             | Yes (1)<br>Yes (1)                                          | Yes (1)<br>Yes (1)                           | Content, face (1)<br>Content, construct, discriminant, nomological (1) | 0.93 (1)<br>0.71–0.92 (1)                                           | NA (0)<br>3–8 min (1)                    | 56.2% (1)<br>NA (0)                                                  | 5<br>5                    |  |                     |
| Sindhvananda <i>et al.</i> <sup>58</sup><br>Albaladejo <i>et al.</i> <sup>87</sup> | Yes including patients (1)<br>Yes (1)                       | Yes (1)<br>Yes (1)                           | Content (1)<br>Content (1)                                             | 0.76 and 0.88 (1)<br>No (0)                                         | NA (0)<br>NA (0)                         | 80.09% (1)<br>66% before intervention;<br>71% after intervention (1) | 5<br>4                    |  |                     |
| Fung <i>et al.</i> <sup>59</sup> 2001<br>Whitty <i>et al.</i> <sup>60</sup>        | Yes including patients (1)<br>Yes including patients (1)    | Yes (1)<br>Yes (1)                           | Content (1)<br>Content (1)                                             | No (0)<br>No (0)                                                    | NA (0)<br>NA (0)                         | 71% (1)<br>73% (1)                                                   | 4<br>4                    |  |                     |
| Wilkinson <i>et al.</i> <sup>90</sup><br>Hüppe <i>et al.</i> <sup>70</sup><br>ANP  | Yes (1)<br>Yes (1)                                          | Yes (1)<br>NA: initial development study (0) | Content (1)<br>Content (1)                                             | No (0)<br>Anesthesia 0.82, nonspecific care 0.75, recovery 0.88 (1) | NA (0)<br>NA                             | 63% (1)<br>NA                                                        | 4<br>3                    |  |                     |
| Tong <i>et al.</i> <sup>91</sup>                                                   | No validation of Abramovitz <i>et al.</i> questionnaire (0) | No (0)                                       | Yes, based on previous study (1)                                       | No but interrater agreement K >0.9 (0)                              | NA (0)                                   | 52% (1)                                                              | 2                         |  |                     |

(Continued)

Table 8. (Continued)

| Author/Instrument                        | Item Generation Score (0–2)            |               | Validity and Reliability Score (0–2)     |                                          | Acceptability Score (0–2) |                                                                  | Total |
|------------------------------------------|----------------------------------------|---------------|------------------------------------------|------------------------------------------|---------------------------|------------------------------------------------------------------|-------|
|                                          | Item Generation                        | Pilot Testing | Validity Tested                          | Reliability Testing (Cronbach $\alpha$ ) | Time to Complete          | Response Rate (% of Recruited Patients Completing Questionnaire) |       |
| Fleisher <i>et al.</i> <sup>88</sup>     | NA (0)                                 | NA (0)        | NA (0)                                   | 0.62 for pain management (1)             | NA (0)                    | 61.4% (1)                                                        | 2     |
| Preassessment                            |                                        |               |                                          |                                          |                           |                                                                  |       |
| Snyder-Ramos <i>et al.</i> <sup>48</sup> | Yes (1)                                | Yes (1)       | Content (1)                              | >0.7 (1)                                 | NA (0)                    | 100% (1)                                                         | 5     |
| Harms <i>et al.</i> <sup>85</sup>        | Yes (1)                                | No (0)        | Content (1)                              | No (0)                                   | NA (0)                    | 91% (1)                                                          | 4     |
| Hering <i>et al.</i> <sup>86</sup>       | NA (1)                                 | Yes (1)       | Content (1)                              | Yes, but no details (1)                  | NA (0)                    | NA (0)                                                           | 3     |
| Maternal                                 |                                        |               |                                          |                                          |                           |                                                                  |       |
| Sindhvananda <i>et al.</i> <sup>18</sup> | Yes (1)                                | Yes (1)       | Content, construct (1)                   | 0.77 (1)                                 | NA (0)                    | 100% (1)                                                         | 5     |
| Maternal satisfaction                    |                                        |               |                                          |                                          |                           |                                                                  |       |
| Morgan <i>et al.</i> <sup>17</sup>       | Yes including patients (1)             | No (0)        | Face, content, construct (1)             | 0.82 (1)                                 | NA (0)                    | 100% (1)                                                         | 4     |
| (MSSCS)                                  |                                        |               |                                          |                                          |                           |                                                                  |       |
| Nikkola <i>et al.</i> <sup>19</sup>      | Yes (1)                                | Yes (1)       | Content (1)                              | No (0)                                   | NA (0)                    | 100% (1)                                                         | 4     |
| Pediatrics                               |                                        |               |                                          |                                          |                           |                                                                  |       |
| Schiff <i>et al.</i> <sup>46</sup>       | Yes including parents and children (1) | Yes (1)       | Content, convergent and discriminant (1) | Sum score 0.868 (0.738–0.896) (1)        | NA (0)                    | 71% (1)                                                          | 5     |
| Pediatric Perianesthesia Questionnaire   |                                        |               |                                          |                                          |                           |                                                                  |       |
| Kain <i>et al.</i> <sup>44</sup>         | Yes (1)                                | Yes (1)       | Content (1)                              | 0.94 (1)                                 | NA (0)                    | 68% (1)                                                          | 5     |
| Khour <i>et al.</i> <sup>45</sup>        | Yes (1)                                | No (0)        | Content (1)                              | 0.62 (1)                                 | NA (0)                    | 100% (1)                                                         | 4     |
| Tait <i>et al.</i> <sup>42</sup>         | Yes including parents (1)              | No (0)        | Content (1)                              | 0.88–0.91 Satisfaction 0.9 (1)           | NA (0)                    | 93.1% (1)                                                        | 4     |
| Iacobucci <i>et al.</i> <sup>43</sup>    | Literature only (1)                    | No (0)        | Construct (1)                            | 0.86 (1)                                 | NA (0)                    | 84% parents, 52.3% children (1)                                  | 4     |
| Chan <i>et al.</i> <sup>41</sup>         | No (0)                                 | No (0)        | Content (1)                              | 0.89 (1)                                 | NA (0)                    | 100% (1)                                                         | 3     |
| Regional                                 |                                        |               |                                          |                                          |                           |                                                                  |       |
| Montenegro <i>et al.</i> <sup>22</sup>   | Yes (1)                                | Yes (1)       | Content (1)                              | 0.78 (1)                                 | NA (0)                    | 100% (1)                                                         | 5     |
| Monitored Anesthesia Care                |                                        |               |                                          |                                          |                           |                                                                  |       |
| Dexter <i>et al.</i> <sup>24</sup>       | Yes including patients (1)             | Yes (1)       | Content, convergent (1)                  | 0.8 (1)                                  | 4.6 $\pm$ 2.3 min (1)     | 92% (1)                                                          | 6     |
| ISAS                                     |                                        |               |                                          |                                          |                           |                                                                  |       |

Scoring system: 0 if not present, 1 if present, max score for each questionnaire 6.

ANP = Anesthesiological Questionnaire; EVAN (G) = Evaluation du Vecu de l'Anesthésie (Generale); ISAS = Iowa Satisfaction with Anesthesia Scale; LPPSq = Leiden Perioperative care Patient Satisfaction questionnaire; MSSCS = Maternal Satisfaction Scale for Cesarean Section; NA = not applicable; SOPPCAS = Scale of Patients' Perceptions of Cardiac Anesthesia Services.

**Table 9.** Recommendations for Satisfaction Questionnaires in Different Clinical Settings

| Name of Questionnaire                                 | Authors                    | Anesthesia Subspecialty   | Clinical Setting Where Applicable | Notes                                                                                                                                                                                                                                           |
|-------------------------------------------------------|----------------------------|---------------------------|-----------------------------------|-------------------------------------------------------------------------------------------------------------------------------------------------------------------------------------------------------------------------------------------------|
| ISAS <sup>24</sup>                                    | Dexter <i>et al.</i>       | Monitored Anesthesia Care | Research and quality improvement  | Commonly used tool. Widely used in follow-up studies. Demonstrates both a robust development process and a high patient and clinician acceptability                                                                                             |
| Quality of preanesthetic visit <sup>92</sup>          | Snyder-Ramos <i>et al.</i> | Preassessment             | Quality improvement               | A good questionnaire suitable for evaluating the preanesthetic visit, however, it was developed in Germany; validation and suitability in other countries is yet to be determined                                                               |
| Perioperative questionnaire <sup>52</sup>             | Capuzzo <i>et al.</i>      | Perioperative             | Quality improvement               | Well-developed, short questionnaire, which has been used to assess satisfaction after general anesthesia and regional anesthesia                                                                                                                |
| Perioperative questionnaire <sup>63</sup>             | Bauer <i>et al.</i>        | Perioperative             | Quality improvement               | Good quality, yet brief questionnaire assessing anesthetic satisfaction and anesthesia-related discomfort. It has been validated both as a written test and interview                                                                           |
| English adaption of the LPPSq <sup>57</sup>           | Jlala <i>et al.</i>        | Perioperative             | Research                          | The English validation of the LPPSq is an acceptable, reliable, and useful tool in clinical research where the English language is spoken. Despite being longer, this questionnaire demonstrated highly acceptable response rates from patients |
| Heidelberg Perianesthetic questionnaire <sup>55</sup> | Schiff <i>et al.</i>       | Perioperative             | Research                          | Although originally developed for the purposes of quality improvement and benchmarking, this lengthy questionnaire may be more suitable for research                                                                                            |

ISAS = Iowa Satisfaction with Anaesthesia Scale; LPPSq = Leiden Perioperative care Patient Satisfaction questionnaire.

undertaken when Schiff *et al.*<sup>46</sup> constructed a “Pediatric Perianesthesia Questionnaire.” This comprised 37 questions and demonstrated extensive item generation, content, and convergent and discriminant validity with excellent internal consistency for all five dimensions. The questionnaire developed by Iacobucci *et al.*<sup>43</sup> is notable for being one of two we identified, which attempted to assess the child’s satisfaction with the anesthetic experience. Although they reviewed the literature, they did not undertake any formal item generation or pilot testing for their questionnaire assessing parental (6 questions) and child (9 questions) satisfaction. They assessed construct validity by comparing parental satisfaction with the child’s reported anxiety, and they tested reliability with test-retesting on 18 parents and 11 children a day after the intervention. They demonstrated good internal consistency (Cronbach  $\alpha$  0.86), with response rates of 84% for parents and 52.3% for children, respectively. This instrument was modified by Lew *et al.*<sup>47</sup> to assess satisfaction with pediatric sedation, rather than anesthesia.

### Perioperative Satisfaction

We found 23 original articles that developed and validated patient-satisfaction measures with perioperative anesthetic care. Within this cohort, these tools have been used to evaluate satisfaction with preoperative assessment conducted by anesthesiologists, regional anesthesia, and/or general anesthesia. We have summarized these preoperative assessment instruments in table 6 and perioperative instruments in table 7; the details of the most rigorously developed and subsequently validated measures are described in the following sections on preoperative assessment and perioperative care.

### Preoperative Assessment (table 6)

Snyder-Ramos *et al.*<sup>48</sup> developed their measure in order to evaluate the quality of the anesthesiologist’s preoperative visit. The tool was divided into two parts: evaluation of satisfaction with the preoperative visit; and the information the patient gained as a result of the visit. This was a German study and its validity and suitability when translated into other languages is yet to be established; however, a recent study,

looking at the use of a preanesthetic information form, used some questions from this original tool.<sup>49</sup> The Consultation and Relational Empathy questionnaire<sup>50</sup> is a 10-question modification of a tool that had been previously developed and validated to assess patient satisfaction with consultations in primary care. The Patient Liaison Group of the United Kingdom Royal College of Anesthetists, discussed the tool to establish validity where generalized reliability, interrater reliability (using G-coefficient, similar to Cronbach  $\alpha$ ), and internal consistency were calculated. This resulted in a reliable and internally valid tool to assess patients' views on anesthetists' interpersonal communication skills.

### Perioperative Care (table 7)

Nineteen questionnaires measuring patient satisfaction with perioperative care are included in our review. Of these, 10 sought patient advice in the development process.<sup>51–60</sup> When Auquier *et al.*<sup>51</sup> initially constructed their 25-item Evaluation du Vecu de l'Anesthesie questionnaire, they conducted a pilot study on 742 patients who underwent procedures under general anesthesia.<sup>51</sup> They concluded that the Evaluation du Vecu de l'Anesthesie questionnaire is valuable in assessing patients' opinions on the perioperative period,<sup>61</sup> and went on to develop the Evaluation du Vecu de l'Anesthesie Generale questionnaire,<sup>62</sup> consisting of 26 questions, which was rigorously psychometrically developed and validated. Both these questionnaires used patient input in the development processes.

Bauer *et al.*<sup>63</sup> looked primarily at measuring satisfaction with anesthesia and secondarily, comparing a 15-item written questionnaire with face-to-face interviews. A robust item-generation process was undertaken and content validity was assured by using anesthetists, nurses, and a literature review in the development of questions; however, no patients were consulted at this initial item stage. Pilot testing, question streamlining, and test–retest reliability were conducted and internal consistency measured (Cronbach  $\alpha$  0.84). This tool has been used once subsequently, to measure satisfaction after carotid endarterectomy.<sup>64</sup>

Caljouw *et al.*<sup>56</sup> developed the 39-question Leiden Perioperative care Patient Satisfaction questionnaire, using the Evaluation du Vecu de l'Anesthesie questionnaire by Auquier *et al.*<sup>51</sup> as their basis for items generation. The English adaptation of the Leiden Perioperative care Patient Satisfaction questionnaire was validated by Jlala *et al.*<sup>57</sup> Pilot and follow-up studies found this tool to be acceptable (response rate >90% for all questions) and reliable (Cronbach  $\alpha$  0.94).

Capuzzo's pilot study<sup>52</sup> generated 10 items for a new questionnaire, using a panel of doctors, nurses, experts, and interviews with patients who had recently received an anesthetic. Reliability and internal consistency were evaluated, and construct validity was assessed based on an assumption that young patients would have a lower satisfaction than older patients, and that a significant relationship between the items and satisfaction would be found. This tool has been used in two further studies.<sup>65,66</sup>

Another rigorous protocol was used in the development and validation of the 29-item patient-satisfaction questionnaire by Heidegger *et al.*<sup>53</sup> They concluded that a psychometric questionnaire for satisfaction with anesthesia care must include areas related to information, involvement in decision-making, and contact with the anesthetist. This tool has been used in three studies since this initial study.<sup>67–69</sup>

During a 5-yr period, Hüppe published three studies evaluating a new perioperative questionnaire now known as the Anesthesiological Questionnaire. The initial study described the development and initial evaluation.<sup>70</sup> The result was a two-part questionnaire with 66 items; part 1 assessing the postoperative period and the patients' symptoms, and part 2 more concerned with satisfaction with anesthetic care, perioperative care, and postoperative recovery. The questionnaire was then modified to 46 items and a further study was performed to test its reliability and validity.<sup>71</sup> Finally, the authors adapted it for use in cardiac anesthesia with further psychometric evaluation in this cohort of patients.<sup>72</sup> The Anesthesiological Questionnaire was also used by Reurer *et al.*<sup>73</sup> to assess satisfaction after elective surgery.

Le May *et al.*<sup>54</sup> also addressed patients' perceptions of cardiac anesthesia services, developing the Scale of Patients' Perceptions of Cardiac Anesthesia Services scale. This included 17 Likert-type questions with 10 sociodemographic and 3 open-ended questions. Of importance, this trial addressed a very homogenous group of cardiac patients and therefore, this specific questionnaire is not necessarily a valid tool for more generalized patients.

In 2008, Schiff *et al.*<sup>55,74</sup> published two studies and developed the 38-item Heidelberg perianesthetic questionnaire to assess perioperative satisfaction for quality improvement and benchmarking purposes. They also used this tool in a study of the anesthetic preoperative evaluation clinic<sup>75</sup> along with another group of questions addressing the pre-anesthetic consultation.<sup>48</sup> The Heidelberg questionnaire has been used by another research group to psychometrically assess patients' suitability for local anesthesia for carotid endarterectomy.<sup>76</sup>

## Discussion

### Summary of Findings

This systematic review identified a large number of questionnaires that have been psychometrically developed to measure patient satisfaction with anesthesia in a variety of clinical specialties and settings. However, of more than 3,000 articles using patient satisfaction as an outcome measure, only 71 used patient-satisfaction measures that were multidimensional and had undergone some sort of psychometric development process. Our qualitative appraisal of the tools used in different areas of anesthesia practice leads us to make recommendations about the tools researchers and clinicians may choose to use for measuring patient satisfaction in different settings. For "Monitored Anesthetic Care," the ISAS<sup>24</sup> is robust, with

high patient and clinician acceptability. For the perioperative assessment of satisfaction, the questionnaires by Capuzzo *et al.*<sup>52</sup> and Bauer *et al.*<sup>63</sup> are short, yet well developed and may be suitable for use in quality-improvement projects. However, the more lengthy questionnaires, such as the English adaption of the Leiden Perioperative care Patient Satisfaction questionnaire<sup>57</sup> and Heidelberg peri-anesthetic questionnaire,<sup>55</sup> are also acceptable to patients, and therefore, may be suitable for research purposes. These recommendations are listed in table 9.

### Limitations

Our study has some limitations. This is not the first systematic review of patient-satisfaction measures in anesthesia; however, previous publications have focused on specific areas of practice, such as ambulatory or regional anesthesia.<sup>14,15</sup> We believe that this is the first systematic review to cover instruments measuring satisfaction with each and every element of the anesthetic experience (including preoperative assessment and postoperative recovery) and every patient group (for example, pediatrics and maternity). We have attempted to minimize bias by not restricting our search on the basis of language; however, we did limit the search to articles published from 1980 onward, as our intention was to provide the reader with information on questionnaires that would be relevant to current practice. Finally, although we have attempted to locate all relevant articles by using a robust search methodology, it is possible that with a review of this size, some relevant articles may have been missed.

### Clinical Implications

The need for a summary of the literature in this field has been demonstrated by our finding that only a small proportion of studies that use patient satisfaction as an outcome, use a multidimensional validated questionnaire to measure it. Within this systematic review we have differentiated “patient satisfaction” questionnaires from “quality of recovery” questionnaires. A poor recovery may delay discharge from the postanesthetic care room or hospital, which has obvious resource implications.<sup>77</sup> Yet, there is evidence that incomplete recovery from various postoperative recovery domains does not always influence patient satisfaction.<sup>78</sup> Psychometrically developed questionnaires are important for the reliable measurement of patient satisfaction with anesthesia care for a number of reasons. First, patient-reported satisfaction with anesthesia is generally high, both in studies and clinical practice; a single question or visual analog scale is likely to lead to this result,<sup>1</sup> therefore providing limited information to enable service evaluation or quality improvement. Second, it is not unusual for patients to have limited knowledge regarding anesthesia and the role of the anesthesiologist; these issues may skew data collection, as questions may be answered with a focus on the “perioperative experience” and not the specific anesthetic care.<sup>15</sup> Finally, a poorly constructed survey instrument can lead to a bias toward the

investigators who designed it; this may result in the reporting of misleading outcomes in clinical studies. During the development process, involving patients in item generation can ensure a patient-focused approach and help to address patient expectations.<sup>52</sup>

Although our review may prove helpful to clinicians and researchers in the future, by summarizing the available measures, there are still unanswered questions in this field. For example, the generalizability of questionnaires across different settings is unclear: it is not necessarily right to assume that a questionnaire is valid outside its country of origin as there may be disparities in health care and patient expectations between nations and healthcare systems. Furthermore, we identified a number of the questionnaires that were developed in countries that did not have English as the first language; their validity after translation has not been established.<sup>18,22,48,58,71,72,79</sup> Only one instrument developed in a non-English-speaking country (the Leiden Perioperative care Patient Satisfaction questionnaire) has been validated after translation into English.<sup>57</sup>

The optimal timing for completing a satisfaction questionnaire for patients undergoing anesthesia is also not clear. A dilemma exists, as within the acute recovery period, the patient may still be under the influence of anesthesia and yet, with the implementation of enhanced recovery programs, many patients are not in hospital for extended periods of time. Patient demographics also require consideration: there is evidence that women have lower satisfaction levels for up to 3 days postoperatively,<sup>80</sup> and also that patients having major and minor surgery will have differences in their recovery profile and, therefore, in their responses to satisfaction surveys.<sup>11</sup> Therefore, the optimal timing (and therefore method) of administration of a patient-satisfaction survey may be different depending on the surgical specialty and the extent of the surgical procedure.

These issues may in turn have an impact on the answers that patients provide and also, on the response rates. Patient responses may be biased in order to please the hospital staff to avoid negative repercussions,<sup>1</sup> and equally satisfaction may be dominated by relief that the operation was a success.<sup>63</sup> In theory, in order to avoid the phenomenon of transference and countertransference, a questionnaire should lead to less bias than an interview.<sup>81</sup> However, Bauer *et al.*<sup>63</sup> found that their standardized interview identified more patients reporting lower degrees of satisfaction and was, therefore, superior in detection of anesthetic quality; however, the resource and cost implications of interviews rule out this method as a means of recording patient satisfaction outside the research setting. In contrast, using a postal questionnaire some time after the patient episode of interest may impact on the number of responses received. Perhaps, surprisingly, there is some evidence that postal questionnaire response rates may be higher than those achieved by questionnaires administered at the hospital.<sup>82</sup> However, this is not consistent with evidence from within the setting of anesthesia

satisfaction surveys, where response rates have been shown to be significantly lower at 9 weeks compared with 1 week and 5 weeks after an anesthetic.<sup>68</sup>

When choosing a questionnaire to use in clinical practice or for research purposes, there are a number of considerations that must be taken into account. Successful completion of a satisfaction questionnaire with minimal missing data is an indication of the clinical acceptability of the tool, thereby supporting its use in practice. Although the optimal length of time to complete an assessment is not clear, a shorter questionnaire that maintains a good level of validity and reliability with simple and easy-to-understand vocabulary is likely to be less of an imposition for patients who are asked to complete it.<sup>79</sup> A validated yet brief questionnaire will be more suitable for audit and quality-improvement purposes, whereas more detailed questionnaires, providing more information, may be more valuable as outcome measures in clinical trials. In areas of anesthesia practice, where there is a range of well-developed tools to choose from, we have made recommendations based on instruments that may be used in either the quality-improvement or research settings, based on the quality of the psychometric development process. However, there are many branches of anesthesiology where further work is required on the development and/or validation of satisfaction measures is required.

Regional anesthesia is gaining popularity, partly due to improvements in safety and success attributed to ultrasound-guided techniques.<sup>83</sup> Our review identified only one tool developed for measuring patient satisfaction after regional anesthesia;<sup>22</sup> further evaluation of this measure would be of value. Satisfaction surrounding the birth of a child is a complex and emotive subject; for this reason, a tool specifically assessing maternal satisfaction with the anesthetic care would be invaluable. Although our review found three original questionnaire designs, the two most robustly developed and validated instruments measured satisfaction after cesarean section.<sup>17,20</sup> There is, therefore, an unmet need for a survey, which can be used to measure the quality of anesthesia care in obstetric patients who do not have operative deliveries, or at least a requirement for

further evaluation of the two existing published tools.<sup>17,20</sup> Pediatric anesthesia, where satisfaction measurement is complicated by the parent–child unit, is another area where an evidence-based process for developing satisfaction measures is important. Children may not evaluate their treatment in the same way as adults; memory at a young age may not be reliable, the power of suggestion should not be overlooked, and there is currently no research to fully elucidate whether a parent can accurately judge their child's satisfaction with anesthesia.<sup>46</sup> The Pediatric Perianesthesia Questionnaire, which is answered by the patient and parent together, was the most robustly developed measure in this field. Although it is lengthy and complex, the high response rate in its development study indicates that it is acceptable to parents, although reducing its complexity may improve its feasibility even further. However, it is only with further evaluation in multiple centers that the true acceptability of this tool can be ascertained.

## Conclusion

It is reassuring that our study has found a large number of well-developed tools to measure satisfaction with perioperative anesthesia care. However, we have also been able to highlight areas where further work would be of benefit. Perhaps our most significant finding is that the vast majority of anesthesia-related studies do not use validated tools to measure satisfaction, where this outcome is thought to be of importance. This omission may lead to biased and misleading results in studies of clinical effectiveness. As well as focusing on further evaluation of existing measures, and development of new tools where necessary, there is a need to encourage clinicians and researchers to incorporate validated measures into everyday practice and in clinical studies. This qualitative appraisal of the literature should provide a guide to anesthetists, reviewers, and editors on the measures that are available and valid, and therefore, assist in increasing the standards of outcome reports in academic studies, and quality improvement in clinical practices.

## Appendix 1. Search Strategy

The MEDLINE search was carried out by searching and exploding the following MeSH (Medical Subject Headings) terms; “Patient satisfaction,” or “consumer satisfaction” and combining with the terms; “Questionnaire(s)” or “Health surveys,” which were also exploded. These were then combined with “Anaesthesia, Obstetrical” or “Anaesthesia” or “Anaesthesia, Epidural” or “Anesthetics, Local” or “Anesthetics” or “Anaesthesia, Spinal” or “Anaesthesia, General” or “Anaesthesia” and the exploded terms were combined with “Anaesthesiology” or “Anaesthesiology”. This search found 9859 articles.

We searched for the following terms in EMBASE; “patient satisfaction” was exploded and combined with “McGill pain questionnaire” or “Questionnaire” or “open ended questionnaire” and “Anaesthesia or Anaesthesia” or “Anaesthesiology or Anaesthesiology,” which were also exploded. To ensure that coverage was broad and complete these were also combined with the following exploded terms; “Local anaesthesia or Local anaesthetic” and “Deep sedation or sedation” or “conscious sedation.” This search found 8806 articles.

## Appendix 2. Additional Articles Using Psychometrically Developed Satisfaction Questionnaires

| Author                                          | Country        | No. of Patients | Type of Surgery                                                                              | Instrument                                                        |
|-------------------------------------------------|----------------|-----------------|----------------------------------------------------------------------------------------------|-------------------------------------------------------------------|
| Attigah <i>et al.</i> <sup>76</sup>             | Germany        | 102             | Carotid endarterectomy                                                                       | Heidelberg Perianesthetic questionnaire                           |
| Benatar-Haserfaty <i>et al.</i> <sup>25</sup>   | Spain          | 58              | Dacrycystorhinostomy                                                                         | ISAS                                                              |
| Benatar-Haserfaty <i>et al.</i> <sup>26</sup>   | Spain          | 233             | Phacoemulsification                                                                          | ISAS                                                              |
| Bevilacqua <i>et al.</i> <sup>64</sup>          | Italy          | 181             | Carotid endarterectomy                                                                       | Bauer's instrument                                                |
| Candiotti <i>et al.</i> <sup>33</sup>           | United States  | 326             | Broad range of procedures requiring MAC                                                      | ISAS                                                              |
| Capuzzo <i>et al.</i> <sup>65</sup>             | Italy          | 1,506           | Mixed                                                                                        | Cappuzzo Questionnaire NRS (0–10)                                 |
| Capuzzo <i>et al.</i> <sup>66</sup>             | Italy          | 150             | Abdominal, thoracic, endocrine, vascular, skin                                               | Cappuzzo Questionnaire NRS (0–10)                                 |
| Cehajic-Kapetanovic <i>et al.</i> <sup>27</sup> | United Kingdom | 140             | Phacoemulsification                                                                          | ISAS                                                              |
| Dalsasso <i>et al.</i> <sup>39</sup>            | Italy          | 500             | General surgery                                                                              | ISAS                                                              |
| Dexter <i>et al.</i> <sup>93</sup>              | United States  | 315             | Sedation with dexmedetomidine                                                                | ISAS                                                              |
| Fung <i>et al.</i> <sup>29</sup>                | United States  | 306             | Phacoemulsification                                                                          | ISAS                                                              |
| Fung <i>et al.</i> <sup>28*</sup>               | United States  | 306             | Phacoemulsification                                                                          | ISAS                                                              |
| Harms <i>et al.</i> <sup>94</sup>               | Switzerland    | 654             | Elective surgery                                                                             | Patient satisfaction questionnaire (unknown validity/reliability) |
| Heidegger <i>et al.</i> <sup>67*</sup>          | Switzerland    | 600             | NA                                                                                           | Heidegger Problem Rating score                                    |
| Hobson <i>et al.</i> <sup>20</sup>              | United Kingdom | 85              | Elective cesarean section                                                                    | MSSCS                                                             |
| Huncke <i>et al.</i> <sup>34</sup>              | United States  | 55              | Elective vascular                                                                            | ISAS                                                              |
| Hüppe <i>et al.</i> <sup>72</sup>               | Germany        | 1,688           | Cardiac                                                                                      | ANP-KA (adapted ANP for cardiac)                                  |
| Ionescu <i>et al.</i> <sup>38</sup>             | Romania        | 70              | Laparoscopic cholecystectomy                                                                 | ISAS                                                              |
| Kwak <i>et al.</i> <sup>40</sup>                | Korea          | 40              | Third molar surgery                                                                          | ISAS                                                              |
| Lee <i>et al.</i> <sup>30</sup>                 | United Kingdom | 32              | Ptosis surgery                                                                               | ISAS                                                              |
| Lew <i>et al.</i> <sup>47</sup>                 | United States  | 220             | Pediatric sedation procedures                                                                | Iacobucci instrument                                              |
| Mercer <i>et al.</i> <sup>50</sup>              | United Kingdom | 1,582           | NA                                                                                           | CARE measure                                                      |
| Morgan <i>et al.</i> <sup>95</sup>              | Canada         | 27              | Elective cesarean sections                                                                   | MSSCS                                                             |
| Onutu <i>et al.</i> <sup>35</sup>               | Romania        | 40              | Orthopedics                                                                                  | ISAS                                                              |
| Pernoud <i>et al.</i> <sup>61</sup>             | France         | 742             | Mixed adult surgery                                                                          | EVAN                                                              |
| Renna <i>et al.</i> <sup>36</sup>               | United Kingdom | 41              | Outpatient transesophageal echocardiography procedures                                       | ISAS                                                              |
| Reurer <i>et al.</i> <sup>73</sup>              | Germany        | 710             | Elective GI, extremities, ENT, thoracic                                                      | ANP-II                                                            |
| Rüschen <i>et al.</i> <sup>31</sup>             | United Kingdom | 28              | Phacoemulsification                                                                          | ISAS                                                              |
| Ryu <i>et al.</i> <sup>32</sup>                 | South Korea    | 81              | Phacoemulsification                                                                          | ISAS                                                              |
| Saal <i>et al.</i> <sup>69</sup>                | Austria        | 642             | NA                                                                                           | Heidegger Problem Rating score                                    |
| Saal <i>et al.</i> <sup>68</sup>                | Switzerland    | 2,214           | Elective general, orthopedics, urology, ophthalmology, ENT, neurosurgery, gynecology surgery | Heidegger Problem Rating score                                    |

(Continued)



## Appendix 2. (Continued)

| Author                                   | Country        | No. of Patients | Type of Surgery                           | Instrument                                                                           |
|------------------------------------------|----------------|-----------------|-------------------------------------------|--------------------------------------------------------------------------------------|
| Samin <i>et al.</i> <sup>23</sup>        | France         | 288             | Ambulatory hand surgery                   | Montenegro Regional questionnaire                                                    |
| Schiff <i>et al.</i> <sup>74</sup>       | Germany        | 480             | Abstract only                             | Heidelberg Perianesthetic questionnaire                                              |
| Schiff <i>et al.</i> <sup>75</sup>       | Germany        | 207             | Anesthesia Preoperative Evaluation Clinic | Heidelberg Perianesthetic Questionnaire and Snyder-Ramos preanesthetic questionnaire |
| Snyder-Ramos <i>et al.</i> <sup>92</sup> | Germany        | 284             | Preassessment                             | Snyder-Ramos <i>et al.</i> instrument                                                |
| Straessle <i>et al.</i> <sup>49</sup>    | Switzerland    | 200             | Orthopedic surgery                        | Snyder-Ramos <i>et al.</i> instrument                                                |
| Winton <i>et al.</i> <sup>37</sup>       | United Kingdom | 25              | Tension-free vaginal tape insertion       | ISAS                                                                                 |

ANP = Anesthesiological Questionnaire; ANP-KA = Anesthesiological Questionnaire Cardiac; CARE = Consultation and Relational Empathy; ENT = ear, nose, and throat; EVAN = Evaluation du Vecu de l'Anesthesie; GI = gastrointestinal; ISAS = Iowa Satisfaction with Anesthesia Scale; MAC = Monitored Anesthetic Care; MSSCS = Maternal Satisfaction Scale for Cesarean Section; NA = not applicable; NRS = numerical rating scale.

## References

- Fung D, Cohen MM: Measuring patient satisfaction with anesthesia care: A review of current methodology. *Anesth Analg* 1998; 87:1089-98
- Bell DM, Halliburton JR, Preston JC: An evaluation of anesthesia patient satisfaction instruments. *AANA J* 2004; 72:211-7
- Moonesinghe SR, Tomlinson AA: Quality improvement and revalidation: Two goals, same strategy? *Br J Anaesth* 2011; 106:447-50
- Pascoe GC: Patient satisfaction in primary health care: A literature review and analysis. *Eval Program Plann* 1983; 6:185-210
- Heidegger T, Saal D, Nuebling M: Patient satisfaction with anaesthesia care: What is patient satisfaction, how should it be measured, and what is the evidence for assuring high patient satisfaction? *Best Pract Res Clin Anaesthesiol* 2006; 20:331-46
- Cleary PD, Edgman-Levitan S, Roberts M, Moloney TW, McMullen W, Walker JD, Delbanco TL: Patients evaluate their hospital care: A national survey. *Health Aff (Millwood)* 1991; 10:254-67
- Cleary PD, Edgman-Levitan S, Walker JD, Gerteis M, Delbanco TL: Using patient reports to improve medical care: A preliminary report from 10 hospitals. *Qual Manag Health Care* 1993; 2:31-8
- Drain M, Clark PA: Measuring experience from patient's perspectives: Implications for national initiatives. *JHQ Online* 2004; W4-6-W4-16
- Linder-Pelz SU: Toward a theory of patient satisfaction. *Soc Sci Med* 1982; 16:577-82
- Fung D, Cohen M: Measuring satisfaction and quality of anaesthesia care: The value of psychometric methodology. *Baillie Best Pract Res Clin Anaesthesiol* 2001; 15:541-54
- Myles PS, Hunt JO, Nightingale CE, Fletcher H, Beh T, Tanil D, Nagy A, Rubinstein A, Ponsford JL: Development and psychometric testing of a quality of recovery score after general anesthesia and surgery in adults. *Anesth Analg* 1999; 88:83-90
- Herrera FJ, Wong J, Chung F: A systematic review of postoperative recovery outcomes measurements after ambulatory surgery. *Anesth Analg* 2007; 105:63-9
- Kluivers KB, Riphagen I, Vierhout ME, Brölmann HA, de Vet HC: Systematic review on recovery specific quality-of-life instruments. *Surgery* 2008; 143:206-15
- Chanthong P, Abrishami A, Wong J, Herrera F, Chung F: Systematic review of questionnaires measuring patient satisfaction in ambulatory anesthesia. *ANESTHESIOLOGY* 2009; 110:1061-7
- Wu CL, Naqibuddin M, Fleisher LA: Measurement of patient satisfaction as an outcome of regional anesthesia and analgesia: A systematic review. *Reg Anesth Pain Med* 2001; 26:196-208
- Liberati A, Altman DG, Tetzlaff J, Mulrow C, Gøtzsche PC, Ioannidis JP, Clarke M, Devereaux PJ, Kleijnen J, Moher D: The PRISMA statement for reporting systematic reviews and meta-analyses of studies that evaluate healthcare interventions: Explanation and elaboration. *BMJ* 2009; 339:b2700
- Morgan PJ, Halpern S, Lo J: The development of a maternal satisfaction scale for caesarean section. *Int J Obstet Anesth* 1999; 8:165-70
- Sindhvananda W, Leelanukrom R, Rodanant O, Sriprajittichai P: Maternal satisfaction to epidural and spinal anesthesia for cesarean section. *J Med Assoc Thai* 2004; 87:628-35
- Nikkola E, Läärä A, Hinkka S, Ekblad U, Kero P, Salonen M: Patient-controlled epidural analgesia in labor does not always improve maternal satisfaction. *Acta Obstet Gynecol Scand* 2006; 85:188-94
- Hobson JA, Slade P, Wrench IJ, Power L: Preoperative anxiety and postoperative satisfaction in women undergoing elective caesarean section. *Int J Obstet Anesth* 2006; 15:18-23
- Sindhvananda W, Leelanukrom R, Tingthanathikul W: A questionnaire for measurement of maternal satisfaction to regional anaesthesia for cesarean section. *Asean J Anaesthesiol* 2002; 3:65-72
- Montenegro A, Pourtalés MC, Greib N, End E, Gaertner E, Tulasne PA, Pottecher T: [Assessment of patient satisfaction after regional anaesthesia in two institutions]. *Ann Fr Anesth Reanim* 2006; 25:687-95
- Samin J, Collange O, Pourtalés MC, Ravaz T, Calon B, Pottecher T: [Assessment of quality in day-case hand surgery]. *Ann Fr Anesth Reanim* 2009; 28:735-42

24. Dexter F, Aker J, Wright WA: Development of a measure of patient satisfaction with monitored anesthesia care: The Iowa Satisfaction with Anesthesia Scale. *ANESTHESIOLOGY* 1997; 87:865–73
25. Benatar-Haserfaty J, Monleón de la Calle MP, Sanz-López A, Muriel García A: [Outpatient external dacryocystorhinostomy under regional anesthesia and sedation]. *Rev Esp Anestesiol Reanim* 2007; 54:23–8
26. Benatar-Haserfaty J, Tercero-López JQ, Cano-Arana A, Royuela-Vicente A: [Patient satisfaction with anesthetic care monitored during phacoemulsification]. *Rev Esp Anestesiol Reanim* 2007; 54:480–3
27. Cehajic-Kapetanovic J, Bishop PN, Liyanage S, King T, Muldoon M, Wearne IM: A novel Ocular Anaesthetic Scoring System, OASS, tool to measure both motor and sensory function following local anaesthesia. *Br J Ophthalmol* 2010; 94:28–32
28. Fung D, Cohen M, Stewart S, Davies A: Can the Iowa Satisfaction with Anesthesia Scale be used to measure patient satisfaction with cataract care under topical local anesthesia and monitored sedation at a community hospital? *Anesth Analg* 2005; 100:1637–43
29. Fung D, Cohen MM, Stewart S, Davies A: What determines patient satisfaction with cataract care under topical local anesthesia and monitored sedation in a community hospital setting? *Anesth Analg* 2005; 100:1644–50
30. Lee EJ, Khandwala M, Jones CA: A randomised controlled trial to compare patient satisfaction with two different types of local anaesthesia in ptosis surgery. *Orbit* 2009; 28:388–91
31. Rüschen H, Celaschi D, Bunce C, Carr C: Randomised controlled trial of sub-Tenon's block *versus* topical anaesthesia for cataract surgery: A comparison of patient satisfaction. *Br J Ophthalmol* 2005; 89:291–3
32. Ryu JH, Kim M, Bahk JH, Do SH, Cheong IY, Kim YC: A comparison of retrobulbar block, sub-Tenon block, and topical anesthesia during cataract surgery. *Eur J Ophthalmol* 2009; 19:240–6
33. Candiotti KA, Bergese SD, Bokesch PM, Feldman MA, Wisemandle W, Bekker AY; MAC Study Group: Monitored anesthesia care with dexmedetomidine: A prospective, randomized, double-blind, multicenter trial. *Anesth Analg* 2010; 110:47–56
34. Huncke TK, Adelman M, Jacobowitz G, Maldonado T, Bekker A: A prospective, randomized, placebo-controlled study evaluating the efficacy of dexmedetomidine for sedation during vascular procedures. *Vasc Endovascular Surg* 2010; 44:257–61
35. Onutu A, Ionescu D, Radut A, Deac D, Iacob I, Lucaciu D: Propofol-TCI and remifentanyl-MCI *vs* remifentanyl-TCI sedation as adjuvant of local anesthesia for orthopaedic surgery. A randomized clinical trial. [Romanian]. *Jurnalul Roman de Anestezie Terapie Intensiva/J Rom Anest Terap Int* 2010; 17:17–22
36. Renna M, Chung R, Li W, Maguire C, Mullen MJ, Chambers J, Henein MY: Remifentanyl plus low-dose midazolam for outpatient sedation in transesophageal echocardiography. *Int J Cardiol* 2009; 136:325–9
37. Winton AL, Eastwood J, Powell MC, Norris AM: An evaluation of conscious sedation using propofol and remifentanyl for tension-free vaginal tape insertion. *Anaesthesia* 2008; 63:932–7
38. Ionescu D, Mărgărit S, Vlad L, Iancu C, Alexe A, Deac D, Răduț A, Tudorică G, Necula A, Pop T: [TIVA-TCI (Total IntraVenous Anesthesia-Target Controlled Infusion) *versus* isoflurane anesthesia for laparoscopic cholecystectomy. Postoperative nausea and vomiting, and patient satisfaction]. *Chirurgia (Bucur)* 2009; 104:167–72
39. Dalsasso M, Tresin P, Innocente F, Veronese S, Ori C: Low-dose ketamine with clonidine and midazolam for adult day care surgery. *Eur J Anaesthesiol* 2005; 22:67–8
40. Kwak HJ, Kim JY, Kwak YL, Park WS, Lee KC: Comparison of a bolus of fentanyl with an infusion of alfentanil during target-controlled propofol infusion in third molar extraction under conscious sedation. *J Oral Maxillofac Surg* 2006; 64:1577–82
41. Chan CS, Molassiotis A: The effects of an educational programme on the anxiety and satisfaction level of parents having parent present induction and visitation in a postanesthesia care unit. *Paediatr Anaesth* 2002; 12:131–9
42. Tait AR, Voepel-Lewis T, Munro HM, Malviya S: Parents' preferences for participation in decisions made regarding their child's anaesthetic care. *Paediatr Anaesth* 2001; 11:283–90
43. Iacobucci T, Federico B, Pintus C, de Francisci G: Evaluation of satisfaction level by parents and children following pediatric anesthesia. *Paediatr Anaesth* 2005; 15:314–20
44. Kain ZN, Mayes LC, Wang SM, Caramico LA, Krivutza DM, Hofstadter MB: Parental presence and a sedative premedicant for children undergoing surgery: A hierarchical study. *ANESTHESIOLOGY* 2000; 92:939–46
45. Khour H, Perreault P, Herzog D: Patient satisfaction with the services of a pediatric digestive tract endoscopy unit: Validation and application of a questionnaire. *Qual Manag Health Care* 2010; 19:82–5
46. Schiff JH, Russ N, Ihringer K, Heal C, Martin E, Walther A: Paediatric Perianesthesia questionnaire: Development and data from eight hospitals across Germany. *Br J Anaesth* 2011; 106:88–95
47. Lew VK, Lalwani K, Palermo TM: Factors affecting parental satisfaction following pediatric procedural sedation. *J Clin Anesth* 2010; 22:29–34
48. Snyder-Ramos SA, Seintsch H, Böttiger BW, Motsch J, Martin E, Bauer M: [Development of a questionnaire to assess the quality of the preanesthetic visit]. *Anaesthesist* 2003; 52:818–29
49. Straessle R, Gilliard N, Frascarolo P, Rossat J, Albrecht E: Is a pre-anaesthetic information form really useful? *Acta Anaesthesiol Scand* 2011; 55:517–23
50. Mercer SW, Hatch DJ, Murray A, Murphy DJ, Eva KW: Capturing patients' views on communication with anaesthetists: The CARE Measure. *Clin Governance: An Int J* 2008; 13(2):128–37
51. Auquier P, Blache JL, Colavolpe C, Eon B, Auffray JP, Pernoud N, Bruder N, Gentile S, François G: [A scale of perioperative satisfaction for anesthesia. I—Construction and validation]. *Ann Fr Anesth Reanim* 1999; 18:848–57
52. Capuzzo M, Landi F, Bassani A, Grassi L, Volta CA, Alvisi R: Emotional and interpersonal factors are most important for patient satisfaction with anaesthesia. *Acta Anaesthesiol Scand* 2005; 49:735–42
53. Heidegger T, Husemann Y, Nuebling M, Morf D, Sieber T, Huth A, Germann R, Innerhofer P, Faserl A, Schubert C, Geibinger C, Flückiger K, Coi T, Kreienbühl G: Patient satisfaction with anaesthesia care: Development of a psychometric questionnaire and benchmarking among six hospitals in Switzerland and Austria. *Br J Anaesth* 2002; 89:863–72
54. Le May S, Hardy JF, Harel F, Taillefer MC, Dupuis G: Patients' perceptions of cardiac anesthesia services: A pilot study. *Can J Anaesth* 2001; 48:1127–42
55. Schiff JH, Fornaschon AS, Frankenhauser S, Schiff M, Snyder-Ramos SA, Martin E, Knapp S, Bauer M, Böttiger BW, Motsch J: The Heidelberg Peri-anaesthetic Questionnaire—Development of a new refined psychometric questionnaire. *Anaesthesia* 2008; 63:1096–104
56. Caljouw MA, van Beuzekom M, Boer F: Patient's satisfaction with perioperative care: Development, validation, and application of a questionnaire. *Br J Anaesth* 2008; 100:637–44
57. Jjala HA, Caljouw MA, Bedforth NM, Hardman JG: Patient satisfaction with perioperative care among patients having orthopedic surgery in a university hospital. *Local Reg Anesth* 2010; 3:49–55
58. Sindhvananda W, Leelanukrom R, Juajarungjai S: A questionnaire for measuring patient satisfaction to general anaesthesia. *J Med Assoc Thai* 2003; 86:1167–76
59. Fung D, Cohen M: What do outpatients value most in their anesthesia care? *Can J Anaesth* 2001; 48:12–9
60. Whitty PM, Shaw IH, Goodwin DR: Patient satisfaction with general anaesthesia. Too difficult to measure? *Anaesthesia* 1996; 51:327–32

61. Pernoud N, Colavolpe JC, Auquier P, Eon B, Auffray JP, François G, Blache JL: [A scale of perioperative satisfaction for anesthesia. II—Preliminary results]. *Ann Fr Anesth Reanim* 1999; 18:858–65
62. Auquier P, Pernoud N, Bruder N, Simeoni MC, Auffray JP, Colavolpe C, François G, Gouin F, Manelli JC, Martin C, Sapin C, Blache JL: Development and validation of a perioperative satisfaction questionnaire. *ANESTHESIOLOGY* 2005; 102:1116–23
63. Bauer M, Böhrer H, Aichele G, Bach A, Martin E: Measuring patient satisfaction with anaesthesia: Perioperative questionnaire *versus* standardised face-to-face interview. *Acta Anaesthesiol Scand* 2001; 45:65–72
64. Bevilacqua S, Romagnoli S, Ciappi F, Lazzeri C, Gelsomino S, Pratesi C, Gensini GF: Anesthesia for carotid endarterectomy: The third option. Patient cooperation during general anesthesia. *Anesth Analg* 2009; 108:1929–36
65. Capuzzo M, Gilli G, Paparella L, Gritti G, Gambi D, Bianconi M, Giunta F, Buccoliero C, Alvisi R: Factors predictive of patient satisfaction with anesthesia. *Anesth Analg* 2007; 105:435–42
66. Capuzzo M, Zanardi B, Schiffino E, Buccoliero C, Gragnaniello D, Bianchi S, Alvisi R: Melatonin does not reduce anxiety more than placebo in the elderly undergoing surgery. *Anesth Analg* 2006; 103:121–3
67. Heidegger T, Nuebling M, Germann R, Borg H, Flückiger K, Coi T, Husemann Y: Patient satisfaction with anesthesia care: Information alone does not lead to improvement. *Can J Anaesth* 2004; 51:801–5
68. Saal D, Nuebling M, Husemann Y, Heidegger T: Effect of timing on the response to postal questionnaires concerning satisfaction with anaesthesia care. *Br J Anaesth* 2005; 94:206–10
69. Saal D, Heidegger T, Nuebling M, Germann R: Does a postoperative visit increase patient satisfaction with anaesthesia care? *Br J Anaesth* 2011; 107:703–9
70. Hüppe M, Klotz KF, Heinzinger M, Prüssmann M, Schmucker P: [Rating the perioperative period by patients. First evaluation of a new questionnaire]. *Anaesthesist* 2000; 49:613–24
71. Hüppe M, Beckhoff M, Klotz KF, Heinzinger M, Prüssmann M, Gerlach K, Ocker H, Schmucker P: [Reliability and validity of the Anaesthesiological Questionnaire for electively operated patients]. *Anaesthesist* 2003; 52:311–20
72. Hüppe M, Zöllner M, Alms A, Bremerich D, Dietrich W, Lüth JU, Michels P, Schirmer U: [The Anaesthesiological Questionnaire for patients in cardiac anaesthesia. Results of a multicenter survey by the scientific working group for cardiac anaesthesia of the German Society for Anaesthesiology and Intensive Care Medicine]. *Anaesthesist* 2005; 54:655–66
73. Reurer M, Hueppe M, Klotz KF, Beckhoff M, Hennig J, Netter P, Schmucker P: Detection of causal relationships between factors influencing adverse side-effects from anaesthesia and convalescence following surgery: A path analytical approach. *Eur J Anaesthesiol* 2004; 21:434–42
74. Schiff J-H, Huppe M, Mollemann A, Putzhofen G, Martin J, Schleppers A, Bothner U, Eberhart LHJ: Evaluated Anaesthesia Questionnaire: Development of a questionnaire to assess patients' experiences with anaesthesia [German]. *Anesthesiologie und Intensivmedizin* 2008; 49: S25–S32
75. Schiff JH, Frankenhauser S, Pritsch M, Fornaschon SA, Snyder-Ramos SA, Heal C, Schmidt K, Martin E, Böttiger BW, Motsch J: The Anesthesia Preoperative Evaluation Clinic (APEC): A prospective randomized controlled trial assessing impact on consultation time, direct costs, patient education and satisfaction with anesthesia care. *Minerva Anestesiol* 2010; 76:491–9
76. Attigah N, Kutter J, Demirel S, Hakimi M, Hinz U, Motsch J, Böckler D: Assessment of patients' satisfaction in carotid surgery under local anaesthesia by psychometrical testing—A prospective cohort study. *Eur J Vasc Endovasc Surg* 2011; 41:76–82
77. Myles PS, Weitkamp B, Jones K, Melick J, Hensen S: Validity and reliability of a postoperative quality of recovery score: The QoR-40. *Br J Anaesth* 2000; 84:11–5
78. Roysse CF, Chung F, Newman S, Stygall J, Wilkinson DJ: Predictors of patient satisfaction with anaesthesia and surgery care: A cohort study using the Postoperative Quality of Recovery Scale. *Eur J Anaesthesiol* 2013; 30:106–10
79. Mui WC, Chang CM, Cheng KF, Lee TY, Ng KO, Tsao KR, Hwang FM: Development and validation of the questionnaire of satisfaction with perioperative anesthetic care for general and regional anesthesia in Taiwanese patients. *ANESTHESIOLOGY* 2011; 114:1064–75
80. Buchanan FF, Myles PS, Cicuttini F: Effect of patient sex on general anaesthesia and recovery. *Br J Anaesth* 2011; 106:832–9
81. Bothner U, Schwilk B, Steffen P, Eberhart LH, Becker U, Georgieff M: [Perioperative monitoring of the course of anesthesia, the postanesthesia visit and inquiry of patient satisfaction. A prospective study of parameters in process and outcome quality in anesthesia]. *Anesthesiol Intensivmed Notfallmed Schmerzther* 1996; 31:608–14
82. Gasquet I, Falissard B, Ravaud P: Impact of reminders and method of questionnaire distribution on patient response to mail-back satisfaction survey. *J Clin Epidemiol* 2001; 54:1174–80
83. Mirza F, Brown AR: Ultrasound-guided regional anesthesia for procedures of the upper extremity. *Anesthesiol Res Pract* 2011; 2011:579824
84. Walker AH, Restuccia JD: Obtaining information on patient satisfaction with hospital care: Mail *versus* telephone. *Health Serv Res* 1984; 19:291–306
85. Harms C, Young JR, Amsler F, Zettler C, Scheidegger D, Kindler CH: Improving anaesthetists' communication skills. *Anaesthesia* 2004; 59:166–72
86. Hering K, Harvan J, Dangelo M, Jasinski D: The use of a computer website prior to scheduled surgery (a pilot study): Impact on patient information, acquisition, anxiety level, and overall satisfaction with anesthesia care. *AANA J* 2005; 73:29–33
87. Albaladejo P, Mann C, Moine P, Panzani M, Ribeyrolles D, Lethellier P, Bernard I, Duranteau J, Benhamou D: [Impact of an information booklet on patient satisfaction in anesthesia]. *Ann Fr Anesth Reanim* 2000; 19:242–8
88. Fleisher LA, Mark L, Lam J, Pearlman A, Fisher Q, Snyder DS, Michelson J, Parker SD: Disseminating information using an anesthesiology consultant report: Impact on patient perceptions of quality of care. *J Clin Anesth* 1999; 11:380–5
89. Lockyer JM, Violato C, Fidler H: A multi source feedback program for anesthesiologists. *Can J Anaesth* 2006; 53:33–9
90. Wilkinson JN, Slater PM: Satisfaction guaranteed? A patient survey of the anaesthesia service. *Anaesthesia* 2010; 65:1048
91. Tong D, Chung F, Wong D: Predictive factors in global and anesthesia satisfaction in ambulatory surgical patients. *ANESTHESIOLOGY* 1997; 87:856–64
92. Snyder-Ramos SA, Seintsch H, Böttiger BW, Motsch J, Martin E, Bauer M: Patient satisfaction and information gain after the preanesthetic visit: A comparison of face-to-face interview, brochure, and video. *Anesth Analg* 2005; 100:1753–8
93. Dexter F, Candiotti KA: Multicenter assessment of the Iowa Satisfaction with Anesthesia Scale, an instrument that measures patient satisfaction with monitored anesthesia care. *Anesth Analg* 2011; 113:364–8
94. Harms C, Nübling M, Langewitz W, Kindler CH: Patient satisfaction with continued *versus* divided anesthetic care. *J Clin Anesth* 2007; 19:9–14
95. Morgan PJ, Halpern S, Lam-McCulloch J: Comparison of maternal satisfaction between epidural and spinal anesthesia for elective Cesarean section. *Can J Anaesth* 2000; 47: 956–61
